## 1 **Neuronal activity promotes nuclear proteasome-mediated degradation of PDCD4 to** 2 **regulate activity-dependent transcription**

3  
4 Wendy A. Herbst<sup>1,2</sup>, Weixian Deng<sup>2</sup>, James A. Wohlschlegel<sup>2</sup>, Jennifer M. Achiro\*<sup>2</sup>, Kelsey  
5 C. Martin\*<sup>2,3</sup>

6  
7 <sup>1</sup>Neuroscience Interdepartmental Program, University of California, Los Angeles, CA, 90095,  
8 USA

9 <sup>2</sup>Department of Biological Chemistry, University of California, Los Angeles, CA, 90095, USA

10 <sup>3</sup>Lead Contact

11 \*Correspondence: [jachiro@mednet.ucla.edu](mailto:jachiro@mednet.ucla.edu) or [kcmartin@mednet.ucla.edu](mailto:kcmartin@mednet.ucla.edu) (co-corresponding  
12 authors)

### 13 14 **Abstract:**

15 Activity-dependent gene expression is critical for synapse development and plasticity. To  
16 elucidate novel mechanisms linking neuronal activity to changes in transcription, we compared  
17 the nuclear proteomes of tetrodotoxin-silenced and bicuculline-stimulated cultured rodent  
18 neurons using nuclear-localized APEX2 proximity biotinylation and mass spectrometry. The  
19 tumor suppressor protein PDCD4 was enriched in the silenced nuclear proteome, and PDCD4  
20 levels rapidly decreased in the nucleus and cytoplasm of stimulated neurons. The activity-  
21 dependent decrease of PDCD4 was prevented by inhibitors of both PKC and proteasome activity  
22 and by a phospho-incompetent mutation of Ser71 in the  $\beta$ TRCP ubiquitin ligase-binding motif of  
23 PDCD4. We compared the activity-dependent transcriptomes of neurons expressing wildtype or  
24 degradation-resistant (S71A) PDCD4. We identified 91 genes as PDCD4 targets at the  
25 transcriptional level, including genes encoding proteins critical for synapse formation,  
26 remodeling, and transmission. Our findings indicate that regulated degradation of nuclear  
27 PDCD4 facilitates activity-dependent transcription in neurons.  
28

### 29 **Introduction:**

30 Stimulus-induced gene expression allows neurons to adapt their structure and function in  
31 response to a dynamically changing external environment (Gallegos et al., 2018; Holt et al.,  
32 2019; Yap & Greenberg, 2018). Activity-dependent transcription is critical to neural circuit  
33 function, from synapse formation during brain development (Flavell et al., 2006; Lin et al., 2008;  
34 Polleux et al., 2007; Wayman et al., 2006; West & Greenberg, 2011) to synaptic plasticity in the  
35 mature brain (Bloodgood et al., 2013; Chen et al., 2017; Ramanan et al., 2005; Tyssowski et al.,  
36 2018; Yap & Greenberg, 2018). Neuronal activity regulates gene expression at multiple levels,  
37 including chromatin modification and transcriptional regulation in the nucleus, as well as RNA  
38 localization, stability, and translation in the cytoplasm (Martin & Ephrussi, 2009). To produce  
39 activity-dependent changes in transcription, signals must be relayed from the site where the  
40 signal is received, at the synapse, to the nucleus. To better understand how neuronal activity is  
41 coupled with changes in transcription, we developed an assay to systematically identify activity-  
42 dependent changes in the nuclear proteome of neurons and therefore elucidate novel mechanisms  
43 by which neuronal activity alters the concentration of specific proteins in the nucleus.

44 Neuronal activity can change the concentration of nuclear proteins via a variety of  
45 mechanisms, from nucleocytoplasmic shuttling of signaling proteins, to synthesis and  
46 degradation of nuclear proteins (Bayraktar et al., 2020; Ch'ng et al., 2012; Dieterich et al., 2008;

47 Lin et al., 2008; Ma et al., 2014; Upadhyaya et al., 2004). While the activity-dependent  
48 transcriptome and translome of neurons has been characterized using RNA sequencing (Brigidi  
49 et al., 2019; Hrvatin et al., 2018; Lacar et al., 2016; Tyssowski et al., 2018) and TRAP-seq (Chen  
50 et al., 2017; Fernandez-Albert et al., 2019), little work has been done to characterize the  
51 population of proteins that undergo activity-dependent changes in nuclear abundance due to  
52 regulated transport or stability. By inhibiting translation to exclude changes due to protein  
53 synthesis, the present study focused on identifying pre-existing proteins that undergo activity-  
54 dependent changes in concentration in the nucleus via regulated nucleocytoplasmic trafficking  
55 and/or changes in stability.

56 Through our screen of nuclear proteins with activity-dependent changes in abundance, we  
57 discovered that **Programmed Cell Death 4** (PDCD4) undergoes a significant reduction in nuclear  
58 concentration following neuronal stimulation. PDCD4 has been studied primarily in the context  
59 of cancer, where it has been found to function as a tumor suppressor and translational inhibitor in  
60 the cytoplasm (Matsushashi et al., 2019; Wang & Yang, 2018; Yang et al., 2003). These studies  
61 have revealed that the abundance of PDCD4 protein is regulated at multiple levels, including via  
62 translation (Asangani et al., 2008; Frankel et al., 2008; Ning et al., 2014), proteasome-mediated  
63 degradation (Dorrello et al., 2006), and nucleocytoplasmic trafficking (Böhm et al., 2003), with  
64 decreases in PDCD4 correlating with invasion, proliferation, and metastasis of many types of  
65 cancers (Allgayer, 2010; Chen et al., 2003; Wang & Yang, 2018; Wei et al., 2012).

66 Despite being expressed at significant levels in the brain, especially in the hippocampus  
67 and cortex (Lein et al., 2007; Li et al., 2020), few studies have addressed the role of PDCD4 in  
68 the nervous system. PDCD4 expression in neurons is altered by injury and stress (Jiang et al.,  
69 2017; Li et al., 2020; Narasimhan et al., 2013), and recent work has shown that, as in cancer  
70 cells, PDCD4 may act as a translational repressor in neurons (Di Paolo et al., 2020; Li et al.,  
71 2020). However, the impact of neuronal activity on PDCD4 concentration and the function of  
72 nuclear, as opposed to cytoplasmic PDCD4, remains unknown.

73 In this study, we describe an assay that represents the first, to our knowledge, to identify  
74 activity-dependent changes in the nuclear proteome of neurons, and does so in a manner that is  
75 independent of translation. Our results not only elucidate a novel mechanism by which activity  
76 can regulate the nuclear proteome, but they also support a role for the tumor suppressor protein  
77 PDCD4 in the nucleus during activity-dependent transcription in neurons.

78  
79

## 80 **Results:**

### 81 Identification of the nuclear proteome from silenced and stimulated neurons using APEX2 82 proximity biotinylation and mass spectrometry

83 To identify proteins that undergo activity-dependent changes in nuclear localization or  
84 abundance, we analyzed the nuclear proteomes of silenced and stimulated cultured rat forebrain  
85 neurons. In developing this assay, we used CREB Regulated Transcriptional Coactivator 1  
86 (CRTC1) as a positive control, as we have previously shown that glutamatergic activity drives  
87 the synapse-to-nucleus import of CRTC1, and that neuronal silencing decreases CRTC1 nuclear  
88 abundance (Ch'ng et al., 2012, 2015). We initially used nuclear fractionation to capture the  
89 nuclear proteins but discovered that CRTC1 leaked out of the nucleus during the assay. This  
90 suggested that nuclear fractionation was not a suitable method and led us to instead use APEX2  
91 proximity biotinylation (Hung et al., 2016), an *in situ* proximity ligation assay, to identify  
92 activity-dependent changes in the nuclear proteome. To specifically label the nuclear proteome,

93 we fused the engineered ascorbate peroxidase APEX2 to two SV40 nuclear localization signals  
94 (NLSs, **Fig 1A**, Kalderon et al., 1984). APEX2 proximity ligation was advantageous for these  
95 experiments for the following reasons: 1) APEX2 biotinylated proteins can be captured directly  
96 by streptavidin pulldown, avoiding the need for subcellular fractionation, 2) biotinylation occurs  
97 rapidly (1-minute labeling period), and 3) APEX2 can be expressed in a specific cell type of  
98 interest. We designed a neuron-specific nuclear-localized APEX2 construct (**Fig 1A**) and  
99 transduced cultured rat forebrain neurons with adeno-associated virus (AAV) expressing  
100 APEX2-NLS. Immunofluorescence of transduced neurons revealed that APEX2-NLS was  
101 expressed specifically in the nucleus (**Fig 1B**). We optimized the multiplicity of infection of  
102 AAV to achieve high transduction efficiency without overexpression of the construct (important  
103 as higher doses of AAV led to APEX2-NLS expression in the cytoplasm). When all three  
104 components of the labeling reaction were supplied (APEX2-NLS, biotin-phenol, and H<sub>2</sub>O<sub>2</sub>),  
105 proteins were biotinylated specifically in neuronal nuclei (**Fig 1B**). No labeling was detected in  
106 the absence of APEX2-NLS, biotin-phenol, or H<sub>2</sub>O<sub>2</sub>.

107 To identify proteins that undergo activity-dependent changes in nuclear abundance, we  
108 silenced neurons for 1 hour with the voltage-gated sodium channel antagonist tetrodotoxin  
109 (TTX) or stimulated neurons for 1 hour with bicuculline (Bic), which inhibits GABA<sub>A</sub> receptors  
110 and drives glutamatergic transmission. We also inhibited protein synthesis using cycloheximide  
111 (CHX) in these experiments because many of the genes that are rapidly transcribed and  
112 translated in response to activity encode nuclear proteins (Alberini, 2009; D. A. Heinz &  
113 Bloodgood, 2020; Yap & Greenberg, 2018). We were concerned that the translation of activity-  
114 dependent genes would overshadow – and thereby hinder the detection of – activity-dependent  
115 changes in the nuclear proteome resulting from alterations in nuclear protein localization or  
116 stability.

117 After silencing or stimulating the neurons for 1 hour and performing the 1-minute  
118 labeling reaction (**Fig 1C**), protein lysates were collected for analysis by western blot and mass  
119 spectrometry. In neurons expressing APEX2-NLS, many proteins at a variety of molecular  
120 weights were biotinylated in both TTX and Bic conditions, while very few proteins were  
121 biotinylated in the No-APEX control, as detected by western blot (**Fig 1D**). The bands detected  
122 in the No-APEX control were at molecular weights of known endogenously biotinylated proteins  
123 (Hung et al., 2016). For mass spectrometry, biotinylated proteins were captured using  
124 streptavidin pulldown and the nuclear proteomes were characterized using the TMT-MS3-SPS  
125 acquisition method (Ting et al., 2011) through LC-MS. We detected 4,407 proteins, and of those,  
126 2,860 proteins were significantly enriched above the No-APEX negative control with log<sub>2</sub> fold  
127 change (FC) > 3 and adjusted p-value < 0.05 (**Table S1**). When comparing the Bic and TTX  
128 conditions, 23 proteins were differentially expressed in the nucleus with log<sub>2</sub>FC > 0.5 (for Bic)  
129 or log<sub>2</sub>FC < -0.5 (for TTX) with p-value < 0.05 (**Table S1**). The highest-ranked protein by  
130 log<sub>2</sub>FC enriched in the Bic versus TTX nuclear proteome was the synapse-to-nucleus signaling  
131 protein, CRT1 (Ch'ng et al., 2012, 2015; Nonaka et al., 2014; Sekeres et al., 2012). The  
132 highest-ranked proteins enriched in the TTX versus Bic nuclear proteome were HDAC4 and  
133 HDAC5, both of which have been reported to undergo nuclear export following neuronal  
134 stimulation (Chawla et al., 2003; Schlumm et al., 2013). Using immunocytochemistry (ICC), we  
135 confirmed that CRT1 increased in the nucleus (median normalized intensity Basal = 1.00, TTX  
136 = 0.33, Bic = 2.64; Basal vs Bic p < 0.0001, TTX vs Bic p < 0.0001) and HDAC4 decreased in  
137 the nucleus (median normalized intensity Basal = 1.00, TTX = 1.79, Bic = 0.61; Basal vs Bic p =  
138 0.0006, TTX vs Bic p < 0.0001) following Bic stimulation (**Fig 1E-H**).

139

140 Neuronal stimulation decreases PDCD4 protein concentration in the nucleus and cytoplasm of  
141 neurons

142 Among the proteins that underwent activity-dependent changes in nuclear concentration,  
143 the PDCD4 protein was significantly enriched in the TTX-treated nuclear proteome compared to  
144 the Bic-treated nuclear proteome. To validate this finding, we characterized the expression of  
145 PDCD4 protein in cultured neurons using ICC, and found that PDCD4 was present both in the  
146 nucleus and cytoplasm of neurons (**Fig 2A, Fig S1A**). Bic stimulation significantly decreased  
147 PDCD4 protein expression in the nucleus by ~50% (median normalized intensity Basal = 1.00,  
148 TTX = 1.00, Bic = 0.55; Basal vs Bic  $p < 0.0001$ , TTX vs Bic  $p < 0.0001$ ; **Fig 2B**), with a  
149 smaller decrease of ~20% in the cytoplasm (median normalized intensity Basal = 1.00, TTX =  
150 1.07, Bic = 0.81; Basal vs Bic  $p < 0.0001$ , TTX vs Bic  $p < 0.0001$ ; **Fig 2C**). The decrease of  
151 PDCD4 occurred within 15 minutes of Bic stimulation, and PDCD4 protein levels continued to  
152 decrease with longer incubations of Bic (**Fig S1B**). After washout of a 1-hour Bic stimulation,  
153 PDCD4 protein expression gradually returned to baseline levels, although only half of the  
154 PDCD4 protein concentration was restored at 24 hours (**Fig S1C**).

155 In complementary experiments, we transduced neurons with AAV expressing C-terminal  
156 HA-tagged PDCD4 (**Fig S1D**) and characterized PDCD4-HA expression by western blot (**Fig**  
157 **2D**) and ICC (**Fig S1E-F**). By western blot, we found that total PDCD4-HA protein levels  
158 decreased by ~50% following Bic stimulation (median normalized intensity TTX/Basal = 1.72,  
159 Bic/Basal = 0.48; **Fig 2D**). By ICC, both nuclear and cytoplasmic PDCD4-HA decreased by  
160 ~40% (**Fig S1E-F**). To further validate the Bic-induced decrease in PDCD4, we also created an  
161 N-terminal V5-tagged PDCD4 plasmid (**Fig S1D**) and transfected the construct in neurons.  
162 Consistent with the results from endogenous PDCD4 and transduced C-terminally HA-tagged  
163 PDCD4, both nuclear and cytoplasmic V5-PDCD4 decreased by ~40% with Bic stimulation (**Fig**  
164 **S1G-H**).

165 We also found that depolarization of neurons with 40 mM KCl for 5 min significantly  
166 decreased PDCD4 protein concentration by ~40% in the nucleus (median normalized intensity  
167 Control = 1.00, KCl = 0.63; Control vs KCl  $p < 0.0001$ ; **Fig 2E**) and ~30% in the cytoplasm  
168 (median normalized intensity Control = 1.00, KCl = 0.70; Control vs KCl  $p < 0.0001$ ; **Fig 2F**), as  
169 detected immediately after the 5 min treatment. These results indicate that increases in  
170 glutamatergic transmission and depolarization lead to a rapid and long-lasting reduction in  
171 PDCD4 abundance in the nucleus of neurons.

172

173 PDCD4 undergoes proteasome-mediated degradation following neuronal stimulation

174 In non-neuronal cells, PDCD4 has been reported to undergo miRNA-mediated  
175 translational repression (Asangani et al., 2008; Frankel et al., 2008; Ning et al., 2014), stimulus-  
176 induced nuclear export (Böhm et al., 2003), and stimulus-induced proteasome-mediated  
177 degradation (Dorrello et al., 2006). Since the assay we used to detect activity-dependent changes  
178 in the nuclear proteome was conducted in the presence of the protein synthesis inhibitor CHX,  
179 we considered it unlikely that the Bic-induced decrease in PDCD4 was due to miRNA-mediated  
180 translational repression. To confirm this, we conducted PDCD4 ICC of TTX-silenced and Bic-  
181 stimulated neurons in the presence or absence of CHX (**Fig S2A-B**). While CHX potently  
182 blocked the activity-dependent increase in FOS immunoreactivity (**Fig S2C**), it did not block the  
183 Bic-induced decrease in PDCD4 (**Fig S2A-B**), thereby ruling out a role for activity-dependent  
184 miRNA-mediated translational regulation.

185 To investigate the mechanism underlying the decrease in nuclear PDCD4, we tested if the  
186 decrease in nuclear abundance was due to activity-dependent increases in nuclear export.  
187 Nuclear export of PDCD4 is mediated by the nuclear export protein, CRM1, and sensitive to the  
188 nuclear export inhibitor, leptomycin B (LMB) (Böhm et al., 2003). Long incubation with LMB  
189 successfully caused nuclear accumulation of PDCD4 in unstimulated neurons (**Fig S2D**), and yet  
190 LMB was unable to prevent the activity-dependent decrease of nuclear PDCD4 following  
191 stimulation (median normalized intensity Basal = 1.00, TTX = 1.08, Bic = 0.59, LMB-Basal =  
192 1.30, LMB-TTX = 1.16, LMB-Bic = 0.52; Basal vs Bic  $p < 0.0001$ , TTX vs Bic  $p < 0.0001$ ,  
193 LMB-Basal vs LMB-Bic  $p < 0.0001$ , LMB-TTX vs LMB-Bic  $p < 0.0001$ ; **Fig 3A**, **Fig S2E**).  
194 This result demonstrates that regulated nuclear export is not required for the activity-dependent  
195 decrease of PDCD4.

196 We hypothesized that regulated ubiquitin proteasome-mediated degradation may explain  
197 the Bic-induced decrease of PDCD4. To test this idea, we incubated TTX and Bic-stimulated  
198 neurons with the proteasome inhibitors epoximicin (EpoX) or bortezomib (Bort). As shown in  
199 **Fig 3B-C** and **Fig S2F-G**, the proteasome inhibitors impaired Bic-induced decreases of PDCD4  
200 in both nucleus and cytoplasm of neurons, indicating that neuronal activity decreases PDCD4  
201 concentrations via proteasome-mediated degradation (**Fig 3B**: median normalized intensity Basal  
202 = 1.00, TTX = 1.18, Bic = 0.62, EpoX-Basal = 0.97, EpoX-TTX = 0.99, EpoX-Bic = 0.88; Basal vs  
203 Bic  $p < 0.0001$ , TTX vs Bic  $p < 0.0001$ , EpoX-Basal vs EpoX-Bic  $p = 0.1662$ , EpoX-TTX vs  
204 EpoX-Bic  $p = 0.0174$ . **Fig 3C**: median normalized intensity Basal = 1.00, TTX = 1.09, Bic =  
205 0.60, Bort-Basal = 1.00, Bort-TTX = 1.04, Bort-Bic = 0.94; Basal vs Bic  $p < 0.0001$ , TTX vs Bic  
206  $p < 0.0001$ , Bort-Basal vs Bort-Bic  $p = 0.6224$ , Bort-TTX vs Bort-Bic  $p = 0.2648$ ). The finding  
207 that the nuclear export inhibitor LMB did not block the Bic-induced decrease of PDCD4 in the  
208 nucleus (**Fig 3A**) indicates that activity regulates proteasome-mediated degradation of nuclear  
209 PDCD4 directly in the nucleus, rather than by nuclear export of PDCD4 followed by degradation  
210 in the cytoplasm.

211 The E3 ubiquitin ligases  $\beta$ TRCP1/2 have been shown to be required for the proteasome-  
212 mediated degradation of PDCD4 in the T98G glioblastoma cell line (Dorrello et al., 2006).  
213  $\beta$ TRCP1/2 belong to the family of Cullin-RING E3 ubiquitin ligases, which require neddylation  
214 in order to be activated (Merlet et al., 2009). To determine if this family of ligases is involved in  
215 the activity-dependent decrease of PDCD4 in neurons, we used the neddylation inhibitor  
216 MLN4924 (MLN) and found that it blocked the Bic-induced decrease of PDCD4 in the nucleus  
217 (**Fig 3D**) and cytoplasm (**Fig S2H**) of neurons (**Fig 3D**: median normalized intensity Basal =  
218 1.00, TTX = 1.11, Bic = 0.64, MLN-Basal = 1.05, MLN-TTX = 0.93, MLN-Bic = 0.95; Basal vs  
219 Bic  $p < 0.0001$ , TTX vs Bic  $p < 0.0001$ , MLN-Basal vs MLN-Bic  $p = 0.329$ , MLN-TTX vs  
220 MLN-Bic  $p = 1$ ). This result further supports the finding that PDCD4 undergoes proteasome-  
221 mediated degradation following Bic stimulation, likely through ubiquitination by  $\beta$ TRCP1/2.  
222

#### 223 PDCD4 S71A mutation and PKC inhibition prevent the activity-dependent decrease of PDCD4

224 PDCD4 contains a canonical  $\beta$ TRCP-binding motif, and a single phospho-incompetent  
225 serine-to-alanine mutation at either Ser67, Ser71, or Ser76 has been shown to prevent the  
226 stimulus-induced degradation of PDCD4 in T98G glioblastoma cells (Dorrello et al., 2006).  
227 Dorrello et al. demonstrated that PDCD4 must be phosphorylated at these sites in order to  
228 interact with  $\beta$ TRCP and undergo subsequent proteasome-mediated degradation. To test if a  
229 mutation in PDCD4 at one of these sites would prevent the activity-dependent decrease of  
230 PDCD4 in neurons, we expressed wild-type (WT) and mutant (S71A) PDCD4-HA in cultured

231 neurons using AAV (**Fig 4A-B**). Similar to endogenous PDCD4, we found that WT PDCD4-HA  
232 decreased following Bic stimulation, with a ~30% decrease in nuclear HA intensity and a ~15%  
233 decrease in cytoplasmic intensity, as detected by ICC (**Fig 4C, Fig S3A**). In contrast, the  
234 PDCD4-HA S71A mutant did not undergo an activity-dependent decrease in either the nucleus  
235 or cytoplasm, but showed a slight activity-dependent increase in nuclear intensity (**Fig 4C**:  
236 median normalized intensity WT-Basal = 1.00, WT-TTX = 1.13, WT-Bic = 0.67, S71A-Basal =  
237 1.05, S71A-TTX = 1.21, S71A-Bic = 1.27; WT-Basal vs WT-Bic  $p < 0.0001$ , WT-TTX vs WT-  
238 Bic  $p < 0.0001$ , S71A-Basal vs S71A-Bic  $p = 0.0034$ , S71A-TTX vs S71A-Bic  $p = 0.14$ ). In  
239 complementary experiments, we found that Bic stimulation resulted in a ~40% decrease of WT  
240 PDCD4-HA signal by western blot, while PDCD4-HA S71A did not change after stimulation  
241 (**Fig 4D**: median normalized intensity WT Bic/Basal = 0.59, S71A Bic/Basal = 0.90).

242 The  $\beta$ TRCP-binding motif is adjacent to a canonical phosphorylation consensus site for  
243 the kinase S6K1 (**Fig 4B**), and Dorrello et al. demonstrated that knockdown of S6K1 prevented  
244 the stimulus-induced degradation of PDCD4 in glioblastoma cells. In neurons, however, we  
245 found that the S6K inhibitor LY2584702 had no effect on the Bic-induced decrease of PDCD4  
246 (**Fig 4E, Fig S3B, Fig 4E**: median normalized intensity Basal = 1.00, TTX = 1.11, Bic = 0.74,  
247 LY-Basal = 1.07, LY-TTX = 1.04, LY-Bic = 0.62; Basal vs Bic  $p < 0.0001$ , TTX vs Bic  $p <$   
248  $0.0001$ , LY-Basal vs LY-Bic  $p < 0.0001$ , LY-TTX vs LY-Bic  $p < 0.0001$ ), despite its ability to  
249 potently inhibit the phosphorylation of a known S6K target, ribosomal protein S6 (**Fig S3C**). In  
250 Huh7 hepatoma cells, mTOR/S6K and phospho-Ser67 are required for epidermal growth factor  
251 (EGF)-induced degradation of PDCD4, whereas protein kinase C (PKC) and phospho-Ser71 are  
252 required for 12-O-tetradecanoylphorbol-13-acetate (TPA)-induced degradation of PDCD4  
253 (Matsushashi et al., 2014, 2019; Nakashima et al., 2010). Of note, Ser71 is a consensus site for  
254 PKC, while Ser67 and Ser76 are consensus sites for S6K1 (**Fig 4B**) (Dorrello et al., 2006;  
255 Matsushashi et al., 2019). We thus hypothesized that PKC may be important for the activity-  
256 dependent degradation of PDCD4 through phosphorylation of Ser71. To test this idea, we used  
257 the pan-PKC inhibitor Ro-31-8425 and found that it completely prevented the activity-dependent  
258 decrease (and slightly increased nuclear intensity) of PDCD4 (**Fig 4F, Fig S3D, Fig 4F**: median  
259 intensity Basal = 1.00, TTX = 1.08, Bic = 0.71, Ro-Basal = 0.87, Ro-TTX = 0.93, Ro-Bic = 0.97;  
260 Basal vs Bic  $p < 0.0001$ , TTX vs Bic  $p < 0.0001$ , Ro-Basal vs Ro-Bic  $p = 0.0114$ , Ro-TTX vs  
261 Ro-Bic  $p = 0.3892$ ). These results suggest that in response to neuronal activity, PKC  
262 phosphorylates PDCD4 at Ser71, which enables the ubiquitin ligase  $\beta$ TRCP1/2 to bind and  
263 promote the proteasome-mediated degradation of PDCD4 in the nucleus.

#### 264 265 Stimulus-induced degradation of PDCD4 regulates the expression of neuronal activity-dependent 266 genes

267 The finding that PDCD4 protein concentration is dynamically regulated in the nucleus in  
268 response to synaptic activity points to a possible nuclear function for PDCD4. To investigate a  
269 role for PDCD4 in the regulation of activity-dependent transcription, we performed RNA-seq of  
270 forebrain cultures transduced with either wild-type PDCD4 or degradation-resistant PDCD4  
271 (S71A), following neuronal silencing with TTX or stimulation with Bic for 1 hour (**Fig 5; Table**  
272 **S2**). Given that PDCD4 has a well-known role in regulating translation, we sought to distinguish  
273 between direct PDCD4-mediated transcriptional changes in the nucleus and the changes in  
274 expression that are downstream of PDCD4-mediated translational changes in the cytoplasm by  
275 performing the experiments in either the presence or absence of CHX. We detected robust Bic-  
276 induced increases in normalized read counts of transcripts for canonical immediate early genes

277 such as *Npas4*, *Rgs2*, and *Egr4* in all biological replicates (**Fig 5A**). We identified 912 activity-  
278 dependent genes, defined as genes with significant differential expression between Bic and TTX  
279 for PDCD4 WT samples (459 upregulated, 453 downregulated; adjusted p-value < 0.05 for WT  
280 no CHX; **Fig 5B-D**). Clustering of activity-dependent genes by fold change across sample type  
281 revealed that most activity-dependent genes showed similar fold changes between PDCD4 WT  
282 and PDCD4 S71A samples (**Fig 5B**), especially for genes with relatively high activity-dependent  
283 fold changes (**Fig 5C**). However, **Fig 5B** also shows that PDCD4 S71A altered activity-  
284 dependent changes in gene expression for a subset of genes. Specifically, we found that PDCD4  
285 S71A led to a decrease in activity-induced differential expression for a substantial proportion of  
286 genes: 43% of activity-dependent upregulated genes (198 genes) and 57% of activity-dependent  
287 downregulated genes (260 genes) were not significantly upregulated or downregulated,  
288 respectively, in the PDCD4 S71A samples (**Fig 5D**). These results suggest that regulated  
289 degradation of PDCD4 is important for the expression of activity-dependent genes in neurons.

290 This inhibition of activity-dependent gene expression could be due to both a potential  
291 role for PDCD4 in transcriptional processes and secondary effects from PDCD4's regulation of  
292 translation of specific transcripts (Matsushashi et al., 2019; Wang & Yang, 2018). To isolate  
293 effects at the transcriptional level, we focused on CHX-insensitive activity-dependent genes, that  
294 is, genes that showed activity-dependent differential expression in both the presence and absence  
295 of CHX (in WT, 459 genes after excluding 3 genes that showed differential expression in  
296 different directions +/- CHX). We ranked CHX-insensitive genes by their change in activity-  
297 dependent fold change between PDCD4 WT and PDCD4 S71A samples and identified 91  
298 putative PDCD4 target genes that showed large differences in activity-dependent gene  
299 expression between wild-type and degradation-resistant PDCD4 samples (see Methods; **Fig 6A**).  
300 We validated the effect of PDCD4 on activity-dependent gene expression with RT-qPCR for two  
301 of the genes with the largest change between PDCD4 WT and PDCD4 S71A (*Scd1* and *Thrsp*;  
302 **Fig S4A**). We performed motif analysis of promoter sequences of the putative PDCD4 target  
303 genes and found similar motifs as in promoters of other CHX-insensitive activity-dependent  
304 genes (e.g. AP-1/TRE, ATF/CRE, Sp1/Klf motifs; **Fig S4B**), suggesting there was not a specific  
305 transcription factor motif associated with putative PDCD4 targets genes. Gene ontology (GO)  
306 analysis of the putative PDCD4 target genes showed enrichment for neuronal signaling terms  
307 such as "nervous system development" (GO:0007399; 28 genes; FDR = 9.28E-04) and  
308 "synapse" (GO:0045202; 18 genes; FDR = 6.54E-03), whereas, for comparison, other CHX-  
309 insensitive activity-dependent genes showed enrichment for terms related to transcription such as  
310 "regulation of gene expression" (GO:0010468; 169 genes; FDR = 3.11E-25) and "nuclear  
311 chromosome" (GO:0000228; 51 genes; FDR = 2.88E-09; **Fig 6B, Table S3**). Putative PDCD4  
312 targets included genes encoding proteins critical for synapse formation, remodeling and  
313 transmission such as *Shank1*, *p35*, *Abhd17b*, *Gap43*, *Cofilin*, *Spectrin-β2*, *Myosin-Va*, *Dendrin*,  
314 *Jacob*, *SNAP-β*, *Voltage-dependent calcium channel-α2/δ1*, *α-tubulin*, and *β-actin* (**Fig 6C**).  
315 Together, these results suggest that PDCD4 functions in the nucleus to regulate the expression of  
316 a subset of genes, and that inhibiting the stimulation-induced degradation of PDCD4 results in a  
317 suppression of the transcription of many activity-dependent genes important for neuronal  
318 synaptic function (**Fig S5**).

319  
320  
321

## Discussion:

322 In this study, we implemented a proximity-ligation assay to systematically characterize  
323 changes in the nuclear proteome triggered by neuronal stimulation. While advances in  
324 transcriptomic technologies have enabled the identification of genes that undergo activity-  
325 dependent changes in expression (Brigidi et al., 2019; Chen et al., 2017; Fernandez-Albert et al.,  
326 2019; Tyssowski et al., 2018), the systematic identification of proteins that undergo changes in  
327 subcellular localization and/or stability has been more challenging. Our results provide the first,  
328 to our knowledge, unbiased characterization of the population of proteins that undergo changes  
329 in nuclear abundance following neuronal silencing and/or glutamatergic stimulation, and does so  
330 in a manner that is independent of translation or transcription. We detected activity-dependent  
331 changes in the known nucleocytoplasmic shuttling proteins, CRTCL and HDAC 4/5 (Ch'ng et  
332 al., 2012; Chawla et al., 2003), demonstrating the validity of this neuron-specific, subcellular  
333 compartment-specific assay.

334 The tumor suppressor protein PDCD4 was among the novel proteins we identified as  
335 undergoing activity-dependent changes in nuclear concentration. Low concentrations of PDCD4  
336 have been reported to correlate with invasion, proliferation, and metastasis of many types of  
337 cancers (Allgayer, 2010; Chen et al., 2003; Wang & Yang, 2018; Wei et al., 2012). The activity-  
338 dependent downregulation of PDCD4 in neurons is reminiscent of the concept of “memory  
339 suppressor genes” (Abel & Kandel, 1998), genes that act as inhibitory constraints on activity-  
340 dependent neuronal plasticity. By analogy to its function during cancer metastases, decreases in  
341 PDCD4 in neurons would function to enable experience-dependent neuronal growth and  
342 remodeling. Dysregulated PDCD4 concentrations have also been reported to underlie a variety of  
343 metabolic disorders, including polycystic ovary syndrome, obesity, diabetes, and atherosclerosis,  
344 highlighting the critical role PDCD4 plays in regulating gene expression in multiple cell types  
345 (Lu et al., 2020). Despite being highly expressed, few studies have examined the function of  
346 PDCD4 in neurons (Di Paolo et al., 2020; Li et al., 2020; Narasimhan et al., 2013), and as far as  
347 we are aware, no previous study has identified a role for PDCD4 in activity-dependent gene  
348 regulation in neurons.

349 In investigating how neuronal activity decreased PDCD4 protein concentrations, we  
350 showed that it occurred via proteasome-mediated degradation. The finding that the nuclear  
351 export inhibitor LMB did not block the activity-dependent decrease of nuclear PDCD4  
352 demonstrated that nuclear PDCD4 is degraded without leaving the nucleus. Many examples of  
353 activity-dependent degradation of proteins *within the cytoplasm* have been reported in neurons  
354 (Banerjee et al., 2009; Hegde et al., 1993; Jarome et al., 2011), but fewer cases of activity-  
355 dependent degradation of proteins *within the nucleus* have been described (Bayraktar et al.,  
356 2020; Kravchick et al., 2016; Upadhyia et al., 2004). Nonetheless, the nucleus contains  
357 machinery for proteasome-mediated degradation and there are numerous examples of proteins  
358 that are degraded by the nuclear proteasome in non-neuronal cells, including transcriptional  
359 regulators and cell-cycle proteins (von Mikecz, 2006). Neuronal nuclei have also been shown to  
360 contain machinery for proteasome-mediated degradation (Mengual et al., 1996) and exhibit  
361 proteasomal activity, albeit with less activity than is present in the cytoplasm (Tydlacka et al.,  
362 2008; Upadhyia et al., 2006).

363 Degradation of PDCD4 is regulated by phosphorylation of PDCD4 by the kinases S6K  
364 and PKC (Dorrello et al., 2006; Matsushashi et al., 2014, 2019; Nakashima et al., 2010; Schmid et  
365 al., 2008). In our experiments, we found that a phospho-incompetent serine-to-alanine mutation  
366 at Ser71 prevented the activity-dependent degradation of PDCD4, and that phosphorylation by  
367 PKC, but not S6K was required for this activity-dependent degradation. This result is consistent



368 with previous studies demonstrating that either S6K or PKC is required for PDCD4  
369 phosphorylation depending on the signaling pathway, with EGF treatment requiring mTOR/S6K  
370 for PDCD4 degradation and TPA treatment requiring PKC (Matsushashi et al., 2019). The  
371 stimulus-specific requirement of either S6K or PKC for PDCD4 degradation raises the  
372 interesting possibility that different types of neuronal stimulation could trigger PDCD4  
373 degradation via distinct signaling pathways. Supporting this idea, two studies in neurons have  
374 suggested that PDCD4 degradation may be mediated by S6K (Di Paolo et al., 2020; Li et al.,  
375 2020), while our study demonstrated that PDCD4 degradation was mediated by PKC but not  
376 S6K. PKC is typically activated at the cell surface (Gould & Newton, 2008), however, it can  
377 translocate from the cytoplasm to the nucleus after activation and can be activated directly in the  
378 nucleus (Lim et al., 2015; Martelli et al., 2006), where it phosphorylates nuclear targets including  
379 histones and transcription factors (Lim et al., 2015; Martelli et al., 2006).

380 PDCD4 has been well-characterized as a translational repressor in cancer cells (Wang et  
381 al., 2017; Wedeken et al., 2011; Yang et al., 2004), and more recently in studies in neurons (Di  
382 Paolo et al., 2020; Li et al., 2020; Narasimhan et al., 2013). PDCD4 binds to the RNA helicase  
383 eIF4A and inhibits translation of mRNAs, particularly those with highly structured 5' UTRs,  
384 including the cell cycle regulator *p53* (Wedeken et al., 2011), the cell growth regulator *Sin1*  
385 (Wang et al., 2017), and, as recently discovered in neurons, the neurotrophic growth factor *Bdnf*  
386 (Li et al., 2020). Further indicative of a role for PDCD4-mediated translational regulation in  
387 neurons, a recent study identified 267 putative translational targets of PDCD4 in PC12 cells, with  
388 decreases in PDCD4 leading to increased axonal growth in PC12 cells and in cultured primary  
389 cortical neurons (Di Paolo et al., 2020).

390 While the role of PDCD4 as a translational repressor has been well studied, the role of  
391 PDCD4 in the nucleus is less well-characterized, even though the protein is predominantly  
392 localized in the nucleus of many cells (Böhm et al., 2003). Our study, however, identified  
393 PDCD4 as a protein that underwent a decrease in nuclear concentration in response to Bic  
394 stimulation, and we detected greater activity-dependent decrease of PDCD4 in the nucleus than  
395 in the cytoplasm, suggesting a possible role for PDCD4 in the nucleus. Previous studies have  
396 indicated that, in non-neuronal cells, PDCD4 has been shown to inhibit AP-1-dependent  
397 transcription, although it is unclear whether this is a direct role in the nucleus (Bitomsky et al.,  
398 2004) or an indirect role regulating the translation of signaling proteins in the cytoplasm (Yang  
399 et al., 2006). PDCD4 has also been shown to bind to the transcription factors CSL (Jo et al.,  
400 2016) and TWIST1 (Shiota et al., 2009) and inhibit their transcriptional activity. In our study, we  
401 found 91 genes that are putative targets of PDCD4, including genes encoding proteins that are  
402 important for synaptic function. These findings suggest that the proteasome-mediated  
403 degradation of PDCD4 in the nucleus is important for regulating activity-dependent transcription  
404 following neuronal stimulation.

405 Taken together, our findings illustrate the utility of proximity-ligation assays in  
406 identifying activity dependent changes in the proteome of subcellular neuronal compartments  
407 and point to the array of cell biological mechanisms by which activity can regulate the neuronal  
408 proteome. They also focus attention on the tumor suppressor gene PDCD4 as a critical regulator  
409 of activity-dependent gene expression in neurons, highlighting a role for PDCD4 in regulating  
410 the transcription of genes involved in synapse formation, remodeling, and transmission. Future  
411 investigation of the mechanisms by which PDCD4 regulates transcription of these genes  
412 provides a means of characterizing the role of PDCD4 as a transcriptional regulator in addition to  
413 its previously well-characterized role as a translational inhibitor (Wang & Yang, 2018). Such

414 studies also promise to deepen our understanding of the specific cell and molecular biological  
415 mechanisms by which experience alters gene expression in neurons to enable the formation and  
416 function of neural circuits.

417  
418

## 419 **Methods:**

420

### 421 **RESOURCE AVAILABILITY:**

422

423 **Lead Contact:** Further information and requests for resources and reagents should be directed to  
424 and will be fulfilled by the Lead Contact, Kelsey Martin ([kcmartin@mednet.ucla.edu](mailto:kcmartin@mednet.ucla.edu)).

425

426 **Materials Availability:** Plasmids generated in this study are available upon request from the  
427 Lead Contact.

428

429 **Data Availability:** The published article includes the mass spectrometry data generated during  
430 this study. The full RNA sequencing data is available online (GEO Accession Number:  
431 GSE163127).

432

### 433 **EXPERIMENTAL MODEL DETAILS**

434

#### 435 **Primary Neuronal Cultures:**

436 All experiments were performed using approaches approved by the UCLA Animal Research  
437 Committee. Forebrain from postnatal day 0 Sprague-Dawley rats (Charles River) was dissected  
438 in cold Hanks' Balanced Salt Solution (HBSS, Thermo Fisher) supplemented with 10 mM  
439 HEPES buffer and 1 mM sodium pyruvate. Sex was not determined and tissue from male and  
440 female pups were pooled. The tissue was chopped finely and digested in 1x trypsin solution  
441 (Thermo Fisher) in HBSS (supplemented with 120  $\mu$ g/mL DNase and 1.2 mM  $\text{CaCl}_2$ ) for 15  
442 minutes at 37°C. The tissue was washed and triturated in Dulbecco's Modified Eagle Medium  
443 (Thermo Fisher) + 10% Fetal Bovine Serum (Omega Scientific) before plating on poly-DL-  
444 lysine (PDLL)-coated (0.1 mg/mL, Sigma) 10 cm dishes or 24-well plates containing acid-etched  
445 PDLL-coated coverslips (Carolina Biologicals). Neurons were plated at a density of 1 forebrain  
446 per 10 cm dish (for mass spectrometry experiments) or 1/2 forebrain per entire 24-well plate (for  
447 immunocytochemistry, RNA-seq, and western blot experiments). Neurons were cultured in  
448 Neurobasal-A (Thermo Fisher) supplemented with 1x B-27 (Thermo Fisher), 0.5 mM glutaMAX  
449 (Thermo Fisher), 25  $\mu$ M monosodium glutamate (Sigma), and 25  $\mu$ M  $\beta$ -mercaptoethanol  
450 (Sigma) and incubated at 37°C, 5%  $\text{CO}_2$ . When applicable, neurons were transfected with  
451 plasmids using Lipofectamine 2000 (Thermo Fisher) according to manufacturer's instructions at  
452 days in vitro (DIV) 2, or transduced with AAV at DIV 13. All experiments were performed at  
453 DIV 20.

454

### 455 **METHOD DETAILS**

456

#### 457 **Generation of Plasmids and AAV:**

458 To create hSyn NLS-APEX2-EGFP-NLS, APEX2 was amplified from the pcDNA3 APEX2-  
459 NES plasmid (gift from Alice Ting, Addgene plasmid #49386) with three sequential sets of

460 primers to add SV40 NLS to both the N-terminus and C-terminus of APEX2 (primer sets 1-3,  
461 **Table S4**). The design of using NLS on both sides of APEX2 was based on the design of Cas9-  
462 NLS (Swiech et al., 2015). NLS-APEX2-NLS was then inserted into the pAAV-hSyn-EGFP  
463 plasmid (gift from Bryan Roth, Addgene plasmid #50465) between the BamHI and EcoRI sites,  
464 replacing the EGFP insert. The final hSyn NLS-APEX2-EGFP-NLS construct was created by  
465 amplifying hSyn NLS-APEX2-NLS (primer set 4, **Table S4**) and EGFP (primer set 5, **Table**  
466 **S4**), and joining the two products at NheI and SacI.

467 To create hSyn PDCD4-HA, rat PDCD4 was amplified from cultured neuron cDNA (primer set  
468 6, **Table S4**) with a C-terminal HA tag, and then inserted into the pAAV-hSyn-EGFP plasmid  
469 between NcoI and EcoRI, replacing the EGFP insert. The S71A mutation was created using site-  
470 directed mutagenesis (services by Genewiz) to mutate serine 71 (TCT) to alanine (GCT). The  
471 hSyn V5-PDCD4-HA construct was created by adding a V5 tag to the N-terminus of PDCD4-  
472 HA using PCR-based mutagenesis (services by Genewiz).

473 AAV9 was generated for APEX2-NLS, PDCD4-HA WT, and PDCD4-HA S71A at Penn Vector  
474 Core.

475

### 476 **Pharmacological Treatments:**

477 Neurons were pre-incubated with cycloheximide (CHX, 60  $\mu$ M, Sigma) for 15 min,  
478 leptomycin B (LMB, 10 nM, Sigma) for 30 min, LY2584702 (1  $\mu$ M, Cayman Chemical) or Ro-  
479 31-8425 (5  $\mu$ M, Sigma) for 1 hr, or epoxomicin (5  $\mu$ M, Enzo Life Sciences), bortezomib (10  
480  $\mu$ M, APEXBIO), or MLN4924 (50 nM, APEXBIO) for 2 hrs before the start of each respective  
481 experiment and remained in the media throughout the duration of each experiment, incubated at  
482 37 °C. For neurons treated with inhibitors dissolved in DMSO (epoxomicin, bortezomib,  
483 MLN4924, LY2584702, and Ro-31-8425), the final DMSO concentration in the media was 0.1%  
484 or less. For neurons treated with LMB, the final methanol concentration in the media was 0.08%.  
485 All control groups received an equivalent concentration of vehicle (DMSO or methanol). To  
486 silence the neurons, 1  $\mu$ M tetrodotoxin (TTX, Tocris) was applied to the neurons for 1 hr. To  
487 stimulate the neurons, 40  $\mu$ M (-)-bicuculline methiodide (Bic, Tocris) was applied to the neurons  
488 for 1 hr unless otherwise stated.

489 For KCl stimulations, neurons were pre-incubated with standard Tyrode's solution (140  
490 mM NaCl, 10 mM HEPES, 5 mM KCl, 3 mM CaCl<sub>2</sub>, 1 mM MgCl<sub>2</sub>, 20 mM glucose, pH 7.4)  
491 containing 1  $\mu$ M TTX for 15 min at room temperature, and then stimulated for 5 min with 40  
492 mM KCl isotonic Tyrode's solution containing TTX. Control cells remained in the standard  
493 Tyrode's solution containing TTX throughout the experiment.

494 Control data from LMB (**Fig 3A**, **Fig S2E**) and CHX (**Fig S2A-B**) experiments were  
495 combined to generate the data shown in **Fig 2B-C**. Two of the bortezomib experiments were  
496 performed concurrently with two of the MLN4924 experiments, and so these experiments  
497 partially share control data in **Fig 3C-D** and **Fig S2G-H**. One of the LY2584702 experiments  
498 was performed concurrently with one of the bortezomib experiments, and so **Fig 4E** and **Fig S3B**  
499 partially shares control data with **Fig 3C** and **Fig S2G**.

500

### 501 **APEX2 Proximity Biotinylation, Streptavidin Pulldown, and On-Bead Tryptic Digestion:**

502 For APEX2 mass spectrometry experiments, 3 biological replicates (sets of cultures)  
503 were prepared, with 3 samples in each replicate (APEX + Bic, APEX + TTX, and No APEX).  
504 Neurons were TTX-silenced or Bic-stimulated for 1 hour in the presence of CHX (as above).  
505 During the final 30 minutes of the treatment, neurons were incubated with 500  $\mu$ M biotin-phenol

506 (APEX-BIO) at 37 °C. During the final 1 minute, labeling was performed by adding H<sub>2</sub>O<sub>2</sub> to a  
507 final concentration of 1 mM. To stop the labeling reaction, neurons were washed three times in  
508 large volumes of quencher solution (phosphate-buffered saline with 10 mM sodium azide, 10  
509 mM sodium ascorbate, and 5 mM Trolox).

510 Neurons were lysed with RIPA (50 mM Tris, 150 mM NaCl, 0.1% SDS, 0.5% sodium  
511 deoxycholate, 1% Triton X-100, pH 7.5) containing protease inhibitor cocktail (Sigma),  
512 phosphatase inhibitor cocktail (Sigma), and quenchers. Lysates were treated with benzonase (200  
513 U/mg protein, Sigma) for 5 min and then clarified by centrifugation at 15,000 g for 10 min.  
514 Samples were concentrated with Amicon centrifugal filter tubes (3K NMWL, Millipore) to at  
515 least 1.5 mg/mL protein and quantified using Pierce 660 nm protein assay kit Thermo Fisher).

516 For each sample, 2 mg of lysate was incubated with 220 µL Pierce streptavidin magnetic  
517 beads (Thermo Fisher) for 60 min at room temperature. Samples were washed twice with RIPA,  
518 once with 1M KCl, once with 0.1 M sodium carbonate, once with 2 M Urea 10 mM Tris-HCl pH  
519 8.0, and twice with RIPA according to (Hung et al., 2016).

520 The streptavidin beads bound by biotinylated proteins were then washed three times with  
521 8 M Urea 100 mM Tris-HCl pH 8.5 and three times with pure water, and then the samples were  
522 resuspended in 100 µl 50 mM TEAB. Samples were reduced and alkylated by sequentially  
523 incubating with 5 mM TCEP and 10 mM iodoacetamide for 30 minutes at room temperature in  
524 the dark on a shaker set to 1000 rpm. The samples were incubated overnight with 0.4 µg Lys-C  
525 and 0.8 µg trypsin protease at 37° C on a shaker set to 1000 rpm. Streptavidin beads were  
526 removed from peptide digests, and peptide digests were desalted using Pierce C18 tips (100 µl  
527 bead volume), dried, and then reconstituted in water.

528

#### 529 **Tandem Mass Tag (TMT) Labeling:**

530 The desalted peptide digests were labeled by TMT reagents according to the manufacturer's  
531 instructions (TMT10plex™ Isobaric Label Reagent Set, catalog number). Essentially, peptides  
532 were incubated with acetonitrile reconstituted TMT labeling reagent for 1 hour and then  
533 quenched by adding hydroxylamine. Sample-label matches are: NoAPEX replicate #1 labeled  
534 with TMT126, APEX+Bic replicate #1 labeled with TMT127N, APEX+TTX replicate #1  
535 labeled with TMT127C, APEX+TTX replicate #2 labeled with TMT128N, NoAPEX replicate  
536 #2 labeled with TMT128C, NoAPEX replicate #3 labeled with TMT129N, APEX+Bic replicate  
537 #2 labeled with TMT129C, APEX+Bic replicate #3 labeled with TMT130N, APEX+TTX  
538 replicate #3 labeled with TMT130C. Labeled samples were then combined, dried and  
539 reconstituted in 0.1% TFA for high pH reversed phase fractionation.

540

#### 541 **High pH Reversed Phase Fractionation:**

542 High pH reversed phase fractionation was performed according to the manufacturer's  
543 instructions (Pierce High pH Reversed-Phase Peptide Fractionation Kit). Essentially, peptides  
544 were bound to the resin in the spin column and then eluted by stepwise incubations with 300 µl  
545 of increasing acetonitrile concentrations. The eight fractions were combined into four fractions  
546 (fractions 1 & 5, 2 & 6, 3 & 7, 4 & 8). Fractions were then dried by vacuum centrifugation and  
547 reconstituted in 5% formic acid for mass spectrometry analysis.

548

#### 549 **LC-MS Data Acquisition:**

550 A 75 µm x 25 cm custom-made C18 column was connected to a nano-flow Dionex Ultimate  
551 3000 UHPLC system. A 140-minute gradient of increasing acetonitrile (ACN) was delivered at a

552 200 nL/min flow rate as follows: 1 – 5.5% ACN phase from minutes 0 – 5, 5.5 – 27.5% ACN  
553 from minutes 5 – 128, 27.5 – 35% ACN from minutes 128 – 135, 35 – 80% ACN from minutes  
554 135 – 136, 80% ACN hold from minutes 136 – 138 and then down to 1% ACN from minutes  
555 138 – 140. An Orbitrap Fusion Lumos Tribrid mass spectrometer TMT-MS3-SPS method was  
556 used for data acquisition. Full MS scans were acquired at 120K resolution in Orbitrap with the  
557 AGC target set to  $2e5$  and a maximum injection time set to 50 ms. MS2 scans were collected in  
558 Ion Trap with Turbo scan rate after isolating precursors with an isolation window of 0.7 m/z and  
559 CID fragmentation using 35% collision energy. MS3 scans were acquired in Orbitrap at 50K  
560 resolution and 10 synchronized selected precursor ions were pooled for each scan using 65%  
561 HCD energy for fragmentation. For data dependent acquisition, a 3-second cycle time was used  
562 to acquire MS/MS spectra corresponding to peptide targets from the preceding full MS scan.  
563 Dynamic exclusion was set to 30 seconds.

564

#### 565 **MS/MS Database Search:**

566 MS/MS database searching was performed using MaxQuant (1.6.10.43) (Cox & Mann, 2008)  
567 against the rat reference proteome from EMBL (UP000002494-10116 RAT, *Rattus norvegicus*,  
568 21649 entries). The search included carbamidomethylation on as a fixed modification and  
569 methionine oxidation and N-terminal acetylation as variable modifications. The digestion mode  
570 was set to trypsin and allowed a maximum of 2 missed cleavages. The precursor mass tolerances  
571 were set to 20 and 4.5 ppm for the first and second searches, respectively, while a 20-ppm mass  
572 tolerance was used for fragment ions. Datasets were filtered at 1% FDR at both the PSM and  
573 protein-level. Quantification type was set to reporter ion MS3 with 10plex TMT option.

574

#### 575 **Statistical Inference in Mass Spectrometry Data:**

576 MSStatsTMT (1.4.1) (Huang et al., 2020) was used to analyze the MaxQuant TMT-MS3 data in  
577 the APEX2 proximity labeling experiment to statistically assess protein enrichment. TTX  
578 channels were used for MS run level normalization. The “msstats” method was then used for  
579 protein summarization. P-values for t-tests were corrected for multiple hypothesis testing using  
580 the Benjamini-Hochberg adjustment. We identified proteins that were enriched above the No  
581 APEX negative control using a  $\log_2FC > 3$  and adjusted p-value  $< 0.05$  cutoff above the No  
582 APEX condition. Of this protein list, we then identified proteins that were differentially  
583 expressed when comparing between Bic and TTX conditions using  $\log_2FC > 0.5$  (for Bic) or  
584  $\log_2FC < -0.5$  (for TTX) with p-value  $< 0.05$ . It is important to note that we used a non-adjusted  
585 p-value cutoff when identifying candidate proteins that were differentially expressed between the  
586 TTX-silenced and Bic-stimulated conditions, because only HDAC4 and six other proteins had a  
587 significant adjusted p-value when using these cutoffs. Even CRT1, a protein that has been  
588 shown to undergo activity-dependent changes in multiple studies (Ch’ng et al., 2012, 2015;  
589 Nonaka et al., 2014) and confirmed again in the present study, did not reach adjusted p-value  
590 significance, suggesting that we do not have the statistical power to detect certain activity-  
591 dependent changes. Because we used non-adjusted p-values to identify candidate proteins, it is  
592 especially important to experimentally validate any potential candidate protein.

593

#### 594 **Protein Extraction and Western Blot:**

595 Neurons were washed in Tyrode’s solution (140 mM NaCl, 10 mM HEPES, 5 mM KCl,  
596 3 mM  $CaCl_2$ , 1 mM  $MgCl_2$ , 20 mM glucose, pH 7.4) and lysed with RIPA (50 mM Tris, 150  
597 mM NaCl, 0.1% SDS, 0.5% sodium deoxycholate, 1% Triton X-100, pH 7.5) containing

598 protease and phosphatase inhibitor cocktails (Sigma). Samples were clarified by centrifugation at  
599 10,000 g for 10 min. Protein concentration was determined using the Pierce BCA protein assay  
600 kit (Thermo Fisher).

601 Protein lysates were boiled in loading buffer (10% glycerol, 1% SDS, 60 mM Tris HCl  
602 pH 7.0, 0.1 M DTT, 0.02% bromophenol blue) for 10 min at 95°C and run on at 8%  
603 polyacrylamide gel for 90 min at 120 V. Samples were wet-transferred onto a 0.2 µm  
604 nitrocellulose membrane for 16 hours at 40 mA. The membrane blocked with Odyssey Blocking  
605 Buffer (LI-COR) and incubated with primary antibodies: mouse HA (BioLegend #901513,  
606 1:1000), mouse TUJ1 (BioLegend #801201, 1:1000), mouse S6 (CST #2317, 1:1000), rabbit  
607 phospho-S6 ser 235/236 (CST #4858, 1:2000) for 3-4 hours at room temperature or overnight at  
608 4°C. The membrane was washed with TBST and incubated with secondary antibodies: anti-  
609 rabbit IRDye 800CW (1:10,000), anti-mouse IRDye 800CW (1:10,000), anti-mouse IRDye  
610 680CW (1:10,000), IRDye 800CW Streptavidin (1:1,000) for 1 hour at room temperature. The  
611 membrane was imaged using the Odyssey Infrared imaging system (LI-COR). Western blots  
612 were quantified using the Image Studio (LI-COR) rectangle tool. The relative intensity of each  
613 band was calculated by normalizing to a loading control (TUJ1). Within each experiment, all  
614 values were normalized to the control (basal) sample.

615

#### 616 **Immunocytochemistry (ICC):**

617 Neurons were fixed with 4% paraformaldehyde in phosphate-buffer saline (PBS) for 10 min,  
618 permeabilized in 0.1% triton X-100 in PBS for 5 min, and blocked in 10% goat serum in PBS for  
619 1 hour. Neurons were incubated with primary antibodies: chicken MAP2 (PhosphoSolutions  
620 #1100-MAP2, 1:1000), rabbit PDCD4 (CST #9535, 1:600), mouse HA (BioLegend #901513,  
621 1:1000), mouse V5 (Thermo Fisher #R960-25, 1:250), rabbit CRT1 (Bethyl #A300-769,  
622 1:1000), rabbit HDAC4 (CST #7628, 1:100), rabbit FOS (CST #2250, 1:500) for 3-4 hours at  
623 room temperature or overnight at 4°C. Neurons were washed with PBS, and incubated at 1:1000  
624 with secondary antibodies: anti-chicken Alexa Fluor 647, anti-rabbit Alexa Fluor 555, anti-  
625 mouse Alexa Fluor 555, Streptavidin Alexa Fluor 555, and Hoechst 33342 stain for 1 hour at  
626 room temperature. Neurons were washed with PBS, and mounted on slides with Aqua-  
627 Poly/Mount (Polysciences) for confocal imaging.

628

#### 629 **Confocal Imaging:**

630 Samples were imaged using a Zeiss LSM 700 confocal microscope with a 40x oil objective and  
631 405 nm, 488 nm, 555 nm, and 639 nm lasers. Identical image acquisition settings were used for  
632 all images within an experiment. For each image acquisition, the experimenter viewed the MAP2  
633 and Hoechst channels to select a field-of-view, and was blind to the experimental channel (HA,  
634 PDCD4, etc.). For each coverslip, images were taken at multiple regions throughout the  
635 coverslip, and 2-3 coverslips were imaged per condition. Images were collected from at least 3  
636 experimental replicates (sets of cultures), unless otherwise stated.

637

#### 638 **Image Analysis:**

639 ICC images were processed using ImageJ (Schindelin et al., 2012). An ImageJ macro was used  
640 to create regions of interest (ROIs) for neuronal nuclei. In brief, the Hoechst signal was used to  
641 outline the nucleus, and the MAP2 signal was used to select neurons and exclude non-neuronal  
642 cells. To create ROIs for neuronal cytoplasm, the cell body of each neuron was manually  
643 outlined using the MAP2 signal and then the nuclear ROI was subtracted from the total cell body

644 ROI. The ROIs were used to calculate the mean intensity in the channel of interest (HA, PDCD4,  
645 etc.) for the nucleus and cytoplasm of each neuron. Within each ICC experimental replicate, the  
646 measured values from all ROIs were normalized to the median value of the control condition  
647 (basal). For experiments using transfected cells (V5 experiments), the measured intensity of each  
648 ROI was normalized to the co-transfection marker (nuclear GFP intensity), in order to normalize  
649 for differences in transfection efficiency between cells.

650

### 651 **RNA Extraction, Library Preparation, RNA Sequencing, and Data Analysis:**

652 Samples were prepared from 3 biological replicates (sets of cultures), with 8 samples in each  
653 replicate (WT Bic, WT TTX, S71A Bic, S71A TTX, CHX WT Bic, CHX WT TTX, CHX S71A  
654 Bic, CHX S71A TTX). RNA was extracted from neuronal cultures using the RNeasy Micro Kit  
655 (Qiagen) according to manufacturer's instructions. Libraries for RNA-Seq were prepared with  
656 Nugen Universal plus mRNA-Seq Kit (Nugen) to generate strand-specific RNA-seq libraries.  
657 Samples were multiplexed, and sequencing was performed on Illumina HiSeq 3000 to a depth of  
658 25 million reads/sample with single-end 65 bp reads. Demultiplexing was performed using  
659 Illumina Bcl2fastq v2.19.1.403 software. The RNA-seq data discussed in this publication have  
660 been deposited in NCBI's Gene Expression Omnibus (Edgar et al., 2002) and are accessible  
661 through GEO Series accession number GSE163127  
662 (<https://www.ncbi.nlm.nih.gov/geo/query/acc.cgi?acc=GSE163127>). Reads were aligned to  
663 *Rattus\_norvegicus* reference genome version Rnor\_6.0 (rn6), and reads per gene was quantified  
664 by STAR 2.27a (Dobin et al., 2013) using Rnor\_6.0 gtf file. We used DESeq2 (Love et al., 2014)  
665 to obtain normalized read counts and perform differential expression analysis, including batch  
666 correction for replicate number (**Table S2**). Putative PDCD4 target genes were identified by first  
667 focusing on genes which showed activity-dependent differential expression in both the presence  
668 and absence of CHX (CHX-insensitive activity-dependent genes; 459 genes after excluding 3  
669 genes which showed differential expression in different directions +/- CHX). We then calculated  
670 the PDCD4 activity-dependent change by taking the difference between the activity-dependent  
671 fold change of PDCD4 WT and PDCD4 S71A samples and normalizing:

672

$$673 \text{PDCD4 change index} = \text{abs}(S-W)/\text{abs}(W)$$

674

675 Where  $S$  is the PDCD4 S71A no CHX Bic vs TTX log<sub>2</sub>FC, and  $W$  is the PDCD4 WT no CHX  
676 Bic vs TTX log<sub>2</sub>FC. We defined putative PDCD4 target genes as those with a PDCD4 change  
677 index > 0.75. Motif analysis was performed using the `findMotifsGenome` command in  
678 HOMER (S. Heinz et al., 2010), using sequences from the TSS and upstream 500 bp as the  
679 promoter sequences for each gene. GO analysis was performed using the Gene Ontology  
680 Resource (Ashburner et al., 2000; Carbon et al., 2019) and PANTHER enrichment tools (Mi et  
681 al., 2019). Cartoon of putative PDCD4 targets was generated using BioRender.com.

682

### 683 **RT-qPCR:**

684 As above, RNA was extracted from neuronal cultures using the RNeasy Micro Kit (Qiagen).  
685 cDNA was synthesized from 500 ng RNA using SuperScript III First-Strand Synthesis System  
686 (Thermo Fisher) with random hexamers. A "No Reverse Transcriptase" sample was also  
687 prepared as a negative control. RT-qPCR was performed on the CFX Connect Real-Time System  
688 (Bio-Rad) using PowerUp SYBR Green Master Mix (Applied Biosystems). Primer pairs were  
689 designed for two housekeeping genes (*Hprt*, *Gapdh*) and two candidate genes (*Scd1*, *Thrsp*)

690 using Primer3Plus (Untergasser et al., 2012) and NCBI Primer-BLAST (Ye et al., 2012) (**Table**  
691 **S4**). RT-qPCR was performed on 6 sets of cultures, with technical triplicate reactions for each  
692 sample. For each gene, relative quantity was calculated using the formula:  $E^{\Delta Ct}$ , where E was  
693 calculated from the primer efficiencies ( $E \approx 2$ ) and  $\Delta Ct$  was calculated using  $Ct_{TTX} - Ct_{Bic}$ .  
694 Relative gene expression was calculated by normalizing the relative quantity of the gene of  
695 interest to the relative quantity of the housekeeping genes *Hprt* and *Gapdh*:  $(E_{gene})^{\Delta Ct_{gene}} /$   
696  $GeoMean[(E_{HPRT})^{\Delta Ct_{HPRT}}, (E_{GAPDH})^{\Delta Ct_{GAPDH}}]$ .

## 697 **QUANTIFICATION AND STATISTICAL ANALYSIS**

698  
699  
700 For ICC experiments, the quantification of signal intensity is displayed in violin plots  
701 using GraphPad Prism. The medians are indicated with thick lines and the quartiles are indicated  
702 with thin lines. “n” refers to the number of neurons in each condition, and all individual data  
703 points were plotted on the graphs. Our sample sizes were not pre-determined. A non-parametric  
704 statistical test (Mann-Whitney U test) was used to calculate statistical significance because our  
705 data were not normally distributed, as indicated by the violin plots. A Bonferroni correction was  
706 used to adjust for multiple hypothesis testing. Statistical significance is indicated by \* $p < 0.05$ ,  
707 \*\* $p < 0.01$ , \*\*\* $p < 0.001$ , and \*\*\*\* $p < 0.0001$ . For Main Figures, the sample sizes are indicated  
708 in the figure legends and the medians, statistical tests, and p-values are indicated in the results  
709 section. For Supplementary Figures, the sample sizes, medians, statistical tests, and p-values are  
710 all indicated in the figure legends.

711 For RT-qPCR experiments, all data points were displayed using GraphPad Prism, with  
712 solid lines indicating the median values. “n” refers to the biological replicates (sets of cultures),  
713 and all data points were plotted on the graphs. The Mann-Whitney U test (Prism) was used to  
714 calculate statistical significance. Statistical significance is indicated by \* $p < 0.05$  and \*\* $p < 0.01$ .  
715 The sample size, medians, statistics tests, and p-values are all indicated in the supplementary  
716 figure legend.

717 For western blot experiments, all data points were displayed using GraphPad Prism, with  
718 solid lines indicating the median values. “n” refers to the biological replicates (sets of cultures),  
719 and all data points were plotted on the graphs. The medians are indicated in the results section  
720 and the sample sizes are indicated in the figure legends.

## 721 **Acknowledgements:**

722 We thank Sylvia Neumann, Marika Watanabe, and Emilie Marcus for their comments on the  
723 manuscript, and members of the Martin lab for helpful discussion. RNA sequencing was  
724 performed at the Technology Center for Genomics & Bioinformatics (TCGB) at UCLA. This  
725 work was supported by NIH grants R01MH077022 to K.C.M. and NRSA F31MH113310 to  
726 W.A.H.

## 727 **Author Contributions:**

728  
729 Conceptualization: W.A.H. and K.C.M.  
730 Methodology: W.A.H., W.D., J.A.W., and K.C.M.  
731 Investigation: W.A.H. (APEX2 and PDCD4 neuron experiments), W.D. (mass spectrometry),  
732 and J.M.A. (RNA-seq data analysis)  
733 Writing – Original Draft: W.A.H., J.M.A., and K.C.M.  
734 Writing – Review & Editing: W.A.H., J.M.A., and K.C.M.



736 Supervision: J.A.W., J.M.A., and K.C.M.

737

738 **Declaration of Interests:**

739 The authors declare no competing interests.

740

## References:

- 741 Abel, T., & Kandel, E. (1998). Positive and negative regulatory mechanisms that mediate long-  
742 term memory storage. *Brain Research Reviews*, 26(2–3), 360–378.  
743 [https://doi.org/10.1016/S0165-0173\(97\)00050-7](https://doi.org/10.1016/S0165-0173(97)00050-7)
- 744 Alberini, C. M. (2009). Transcription factors in long-term memory and synaptic plasticity. In  
745 *Physiological Reviews* (Vol. 89, Issue 1, pp. 121–145).  
746 <https://doi.org/10.1152/physrev.00017.2008>
- 747 Allgayer, H. (2010). Pcd4, a colon cancer prognostic that is regulated by a microRNA. In  
748 *Critical Reviews in Oncology/Hematology* (Vol. 73, Issue 3, pp. 185–191).  
749 <https://doi.org/10.1016/j.critrevonc.2009.09.001>
- 750 Asangani, I. A., Rasheed, S. A. K., Nikolova, D. A., Leupold, J. H., Colburn, N. H., Post, S., &  
751 Allgayer, H. (2008). MicroRNA-21 (miR-21) post-transcriptionally downregulates tumor  
752 suppressor Pcd4 and stimulates invasion, intravasation and metastasis in colorectal cancer.  
753 *Oncogene*, 27(15), 2128–2136. <https://doi.org/10.1038/sj.onc.1210856>
- 754 Ashburner, M., Ball, C. A., Blake, J. A., Botstein, D., Butler, H., Cherry, J. M., Davis, A. P.,  
755 Dolinski, K., Dwight, S. S., Eppig, J. T., Harris, M. A., Hill, D. P., Issel-Tarver, L.,  
756 Kasarskis, A., Lewis, S., Matese, J. C., Richardson, J. E., Ringwald, M., Rubin, G. M., &  
757 Sherlock, G. (2000). Gene ontology: Tool for the unification of biology. In *Nature Genetics*  
758 (Vol. 25, Issue 1, pp. 25–29). <https://doi.org/10.1038/75556>
- 759 Banerjee, S., Neveu, P., & Kosik, K. S. (2009). A Coordinated Local Translational Control Point  
760 at the Synapse Involving Relief from Silencing and MOV10 Degradation. *Neuron*, 64(6),  
761 871–884. <https://doi.org/10.1016/j.neuron.2009.11.023>
- 762 Bayraktar, G., Yuanxiang, P. A., Confettura, A. D., Gomes, G. M., Raza, S. A., Stork, O.,  
763 Tajima, S., Suetake, I., Karpova, A., Yildirim, F., & Kreutz, M. R. (2020). Synaptic control  
764 of DNA methylation involves activity-dependent degradation of DNMT3A1 in the nucleus.  
765 *Neuropsychopharmacology*, 45(12), 2120–2130. [https://doi.org/10.1038/s41386-020-0780-](https://doi.org/10.1038/s41386-020-0780-2)  
766 2
- 767 Bitomsky, N., Böhm, M., & Klempnauer, K. H. (2004). Transformation suppressor protein  
768 Pcd4 interferes with JNK-mediated phosphorylation of c-Jun and recruitment of the  
769 coactivator p300 by c-Jun. *Oncogene*, 23(45), 7484–7493.  
770 <https://doi.org/10.1038/sj.onc.1208064>
- 771 Bloodgood, B. L., Sharma, N., Browne, H. A., Trepman, A. Z., & Greenberg, M. E. (2013). The  
772 activity-dependent transcription factor NPAS4 regulates domain-specific inhibition. *Nature*,  
773 503(7474), 121–125. <https://doi.org/10.1038/nature12743>
- 774 Böhm, M., Sawicka, K., Siebrasse, J. P., Brehmer-Fastnacht, A., Peters, R., & Klempnauer, K.  
775 H. (2003). The transformation suppressor protein Pcd4 shuttles between nucleus and  
776 cytoplasm and binds RNA. *Oncogene*, 22(31), 4905–4910.  
777 <https://doi.org/10.1038/sj.onc.1206710>
- 778 Brigidi, G. S., Hayes, M. G. B., Delos Santos, N. P., Hartzell, A. L., Texari, L., Lin, P. A.,  
779 Bartlett, A., Ecker, J. R., Benner, C., Heinz, S., & Bloodgood, B. L. (2019). Genomic  
780 Decoding of Neuronal Depolarization by Stimulus-Specific NPAS4 Heterodimers. *Cell*,  
781 179(2), 373–391.e27. <https://doi.org/10.1016/j.cell.2019.09.004>
- 782 Carbon, S., Douglass, E., Dunn, N., Good, B., Harris, N. L., Lewis, S. E., Mungall, C. J., Basu,  
783 S., Chisholm, R. L., Dodson, R. J., Hartline, E., Fey, P., Thomas, P. D., Albou, L. P., Ebert,  
784 D., Kesling, M. J., Mi, H., Muruganujan, A., Huang, X., ... Westerfield, M. (2019). The

- 785 Gene Ontology Resource: 20 years and still GOing strong. *Nucleic Acids Research*, 47(D1),  
786 D330–D338. <https://doi.org/10.1093/nar/gky1055>
- 787 Ch'ng, T. H., DeSalvo, M., Lin, P., Vashisht, A., Wohlschlegel, J. A., & Martin, K. C. (2015).  
788 Cell biological mechanisms of activity-dependent synapse to nucleus translocation of  
789 CRTCC1 in neurons. *Frontiers in Molecular Neuroscience*, 8, 48.  
790 <https://doi.org/10.3389/fnmol.2015.00048>
- 791 Ch'ng, T. H., Uzgil, B., Lin, P., Avliyakov, N. K., O'Dell, T. J., & Martin, K. C. (2012).  
792 Activity-dependent transport of the transcriptional coactivator CRTCC1 from synapse to  
793 nucleus. *Cell*, 150(1), 207–221. <https://doi.org/10.1016/j.cell.2012.05.027>
- 794 Chawla, S., Vanhoutte, P., Arnold, F. J. L., Huang, C. L. H., & Bading, H. (2003). Neuronal  
795 activity-dependent nucleocytoplasmic shuttling of HDAC4 and HDAC5. *Journal of*  
796 *Neurochemistry*, 85(1), 151–159. <https://doi.org/10.1046/j.1471-4159.2003.01648.x>
- 797 Chen, P. B., Kawaguchi, R., Blum, C., Achiro, J. M., Coppola, G., O'Dell, T. J., & Martin, K. C.  
798 (2017). Mapping gene expression in excitatory neurons during hippocampal late-phase  
799 long-term potentiation. *Frontiers in Molecular Neuroscience*, 10.  
800 <https://doi.org/10.3389/fnmol.2017.00039>
- 801 Chen, Y., Knösel, T., Kristiansen, G., Pietas, A., Garber, M. E., Matsuhashi, S., Ozaki, I., &  
802 Petersen, I. (2003). Loss of PDCD4 expression in human lung cancer correlates with tumour  
803 progression and prognosis. *Journal of Pathology*, 200(5), 640–646.  
804 <https://doi.org/10.1002/path.1378>
- 805 Cox, J., & Mann, M. (2008). MaxQuant enables high peptide identification rates, individualized  
806 p.p.b.-range mass accuracies and proteome-wide protein quantification. *Nature*  
807 *Biotechnology*, 26(12), 1367–1372. <https://doi.org/10.1038/nbt.1511>
- 808 Di Paolo, A., Eastman, G., Mesquita-Ribeiro, R., Farias, J., Macklin, A., Kislinger, T., Nancy,  
809 C., Munroe, D., Sosa, J. R. S., Dajas-Bailador, F., & Sotelo-Silveira, J. R. (2020). PDCD4  
810 regulates axonal growth by translational repression of neurite growth-related genes and is  
811 modulated during nerve injury responses. *RNA*, 26(11), 1637–1653.  
812 <https://doi.org/10.1261/rna.075424.120>
- 813 Dieterich, D. C., Karpova, A., Mikhaylova, M., Zdobnova, I., König, I., Landwehr, M., Kreutz,  
814 M., Smalla, K. H., Richter, K., Landgraf, P., Reissner, C., Boeckers, T. M., Zuschratter, W.,  
815 Spilker, C., Seidenbecher, C. I., Garner, C. C., Gundelfinger, E. D., & Kreutz, M. R. (2008).  
816 Caldendrin-Jacob: A protein liaison that couples NMDA receptor signalling to the nucleus.  
817 *PLoS Biology*, 6(2), 0286–0306. <https://doi.org/10.1371/journal.pbio.0060034>
- 818 Dobin, A., Davis, C. A., Schlesinger, F., Drenkow, J., Zaleski, C., Jha, S., Batut, P., Chaisson,  
819 M., & Gingeras, T. R. (2013). STAR: Ultrafast universal RNA-seq aligner. *Bioinformatics*,  
820 29(1), 15–21. <https://doi.org/10.1093/bioinformatics/bts635>
- 821 Dorrello, N. V., Peschiaroli, A., Guardavaccaro, D., Colburn, N. H., Sherman, N. E., & Pagano,  
822 M. (2006). S6k1- and  $\beta$ TRCP-mediated degradation of PDCD4 promotes protein translation  
823 and cell growth. *Science*, 314(5798), 467–471. <https://doi.org/10.1126/science.1130276>
- 824 Edgar, R., Domrachev, M., & Lash, A. E. (2002). Gene Expression Omnibus: NCBI gene  
825 expression and hybridization array data repository. *Nucleic Acids Research*, 30(1), 207–210.  
826 <https://doi.org/10.1093/nar/30.1.207>
- 827 Fernandez-Albert, J., Lipinski, M., Lopez-Cascales, M. T., Rowley, M. J., Martin-Gonzalez, A.  
828 M., del Blanco, B., Corces, V. G., & Barco, A. (2019). Immediate and deferred epigenomic  
829 signatures of in vivo neuronal activation in mouse hippocampus. *Nature Neuroscience*,  
830 22(10), 1718–1730. <https://doi.org/10.1038/s41593-019-0476-2>

- 831 Flavell, S. W., Cowan, C. W., Kim, T. K., Greer, P. L., Lin, Y., Paradis, S., Griffith, E. C., Hu,  
832 L. S., Chen, C., & Greenberg, M. E. (2006). Activity-dependent regulation of MEF2  
833 transcription factors suppresses excitatory synapse number. *Science*, *311*(5763), 1008–1012.  
834 <https://doi.org/10.1126/science.1122511>
- 835 Frankel, L. B., Christoffersen, N. R., Jacobsen, A., Lindow, M., Krogh, A., & Lund, A. H.  
836 (2008). Programmed cell death 4 (PDCD4) is an important functional target of the  
837 microRNA miR-21 in breast cancer cells. *Journal of Biological Chemistry*, *283*(2), 1026–  
838 1033. <https://doi.org/10.1074/jbc.M707224200>
- 839 Gallegos, D. A., Chan, U., Chen, L. F., & West, A. E. (2018). Chromatin Regulation of Neuronal  
840 Maturation and Plasticity. In *Trends in Neurosciences* (Vol. 41, Issue 5, pp. 311–324).  
841 <https://doi.org/10.1016/j.tins.2018.02.009>
- 842 Gould, C., & Newton, A. (2008). The Life and Death of Protein Kinase C. *Current Drug*  
843 *Targets*, *9*(8), 614–625. <https://doi.org/10.2174/138945008785132411>
- 844 Hegde, A. N., Goldberg, A. L., & Schwartz, J. H. (1993). Regulatory subunits of cAMP-  
845 dependent protein kinases are degraded after conjugation to ubiquitin: A molecular  
846 mechanism underlying long-term synaptic plasticity. *Proceedings of the National Academy*  
847 *of Sciences of the United States of America*, *90*(16), 7436–7440.  
848 <https://doi.org/10.1073/pnas.90.16.7436>
- 849 Heinz, D. A., & Bloodgood, B. L. (2020). Mechanisms that communicate features of neuronal  
850 activity to the genome. In *Current Opinion in Neurobiology* (Vol. 63, pp. 131–136).  
851 <https://doi.org/10.1016/j.conb.2020.03.002>
- 852 Heinz, S., Benner, C., Spann, N., Bertolino, E., Lin, Y. C., Laslo, P., Cheng, J. X., Murre, C.,  
853 Singh, H., & Glass, C. K. (2010). Simple Combinations of Lineage-Determining  
854 Transcription Factors Prime cis-Regulatory Elements Required for Macrophage and B Cell  
855 Identities. *Molecular Cell*, *38*(4), 576–589. <https://doi.org/10.1016/j.molcel.2010.05.004>
- 856 Holt, C. E., Martin, K. C., & Schuman, E. M. (2019). Local translation in neurons: visualization  
857 and function. In *Nature Structural and Molecular Biology* (Vol. 26, Issue 7, pp. 557–566).  
858 <https://doi.org/10.1038/s41594-019-0263-5>
- 859 Hrvatin, S., Hochbaum, D. R., Nagy, M. A., Cicconet, M., Robertson, K., Cheadle, L., Zilionis,  
860 R., Ratner, A., Borges-Monroy, R., Klein, A. M., Sabatini, B. L., & Greenberg, M. E.  
861 (2018). Single-cell analysis of experience-dependent transcriptomic states in the mouse  
862 visual cortex. *Nature Neuroscience*, *21*(1), 120–129. <https://doi.org/10.1038/s41593-017-0029-5>
- 863
- 864 Huang, T., Choi, M., Tzouros, M., Golling, S., Pandya, N. J., Banfai, B., Dunkley, T., & Vitek,  
865 O. (2020). MSstatsTMT: Statistical Detection of Differentially Abundant Proteins in  
866 Experiments with Isobaric Labeling and Multiple Mixtures. *Molecular & Cellular*  
867 *Proteomics : MCP*, *19*(10), 1706–1723. <https://doi.org/10.1074/mcp.RA120.002105>
- 868 Hung, V., Udeshi, N. D., Lam, S. S., Loh, K. H., Cox, K. J., Pedram, K., Carr, S. A., & Ting, A.  
869 Y. (2016). Spatially resolved proteomic mapping in living cells with the engineered  
870 peroxidase APEX2. *Nature Protocols*, *11*(3), 456–475.  
871 <https://doi.org/10.1038/nprot.2016.018>
- 872 Jarome, T. J., Werner, C. T., Kwapis, J. L., & Helmstetter, F. J. (2011). Activity dependent  
873 protein degradation is critical for the formation and stability of fear memory in the  
874 amygdala. *PLoS ONE*, *6*(9). <https://doi.org/10.1371/journal.pone.0024349>
- 875 Jiang, Y., Zhao, S., Ding, Y., Nong, L., Li, H., Gao, G., Zhou, D., & Xu, N. (2017). MicroRNA-  
876 21 promotes neurite outgrowth by regulating PDCD4 in a rat model of spinal cord injury.

- 877 *Molecular Medicine Reports*, 16(3), 2522–2528. <https://doi.org/10.3892/mmr.2017.6862>
- 878 Jo, S. H., Kim, D. E., Clocchiatti, A., & Dotto, G. P. (2016). PDCD4 is a CSL associated protein  
879 with a transcription repressive function in cancer associated fibroblast activation.  
880 *Oncotarget*, 7(37), 58717–58727. <https://doi.org/10.18632/oncotarget.11227>
- 881 Kalderon, D., Roberts, B. L., Richardson, W. D., & Smith, A. E. (1984). A short amino acid  
882 sequence able to specify nuclear location. *Cell*, 39(3 PART 2), 499–509.  
883 [https://doi.org/10.1016/0092-8674\(84\)90457-4](https://doi.org/10.1016/0092-8674(84)90457-4)
- 884 Kravchick, D. O., Karpova, A., Hrdinka, M., Lopez-rojas, J., Iacobas, S., Carbonell, A. U.,  
885 Iacobas, D. A., Kreutz, M. R., & Jordan, B. A. (2016). Synaptonuclear messenger PRR 7  
886 inhibits c-Jun ubiquitination and regulates NMDA-mediated excitotoxicity. *The EMBO*  
887 *Journal*, 35(17), 1923–1934. <https://doi.org/10.15252/embj.201593070>
- 888 Lacar, B., Linker, S. B., Jaeger, B. N., Krishnaswami, S., Barron, J., Kelder, M., Parylak, S.,  
889 Paquola, A., Venepally, P., Novotny, M., O'Connor, C., Fitzpatrick, C., Erwin, J., Hsu, J.  
890 Y., Husband, D., McConnell, M. J., Lasken, R., & Gage, F. H. (2016). Nuclear RNA-seq of  
891 single neurons reveals molecular signatures of activation. *Nature Communications*, 7.  
892 <https://doi.org/10.1038/ncomms11022>
- 893 Lein, E. S., Hawrylycz, M. J., Ao, N., Ayres, M., Bensinger, A., Bernard, A., Boe, A. F.,  
894 Boguski, M. S., Brockway, K. S., Byrnes, E. J., Chen, L., Chen, L., Chen, T. M., Chin, M.  
895 C., Chong, J., Crook, B. E., Czaplinska, A., Dang, C. N., Datta, S., ... Jones, A. R. (2007).  
896 Genome-wide atlas of gene expression in the adult mouse brain. *Nature*, 445(7124), 168–  
897 176. <https://doi.org/10.1038/nature05453>
- 898 Li, Y., Jia, Y., Wang, D., Zhuang, X., Li, Y., Guo, C., Chu, H., Zhu, F., Wang, J., Wang, X.,  
899 Wang, Q., Zhao, W., Shi, Y., Chen, W., & Zhang, L. (2020). Programmed cell death 4 as an  
900 endogenous suppressor of BDNF translation is involved in stress-induced depression.  
901 *Molecular Psychiatry*. <https://doi.org/10.1038/s41380-020-0692-x>
- 902 Lim, P. S., Sutton, C. R., & Rao, S. (2015). Protein kinase C in the immune system: From  
903 signalling to chromatin regulation. *Immunology*, 146(4), 508–522.  
904 <https://doi.org/10.1111/imm.12510>
- 905 Lin, Y., Bloodgood, B. L., Hauser, J. L., Lapan, A. D., Koon, A. C., Kim, T. K., Hu, L. S.,  
906 Malik, A. N., & Greenberg, M. E. (2008). Activity-dependent regulation of inhibitory  
907 synapse development by Npas4. *Nature*, 455(7217), 1198–1204.  
908 <https://doi.org/10.1038/nature07319>
- 909 Love, M. I., Huber, W., & Anders, S. (2014). Moderated estimation of fold change and  
910 dispersion for RNA-seq data with DESeq2. *Genome Biology*, 15(12).  
911 <https://doi.org/10.1186/s13059-014-0550-8>
- 912 Lu, K., Chen, Q., Li, M., He, L., Riaz, F., Zhang, T., & Li, D. (2020). Programmed cell death  
913 factor 4 (PDCD4), a novel therapy target for metabolic diseases besides cancer. In *Free*  
914 *Radical Biology and Medicine* (Vol. 159, pp. 150–163).  
915 <https://doi.org/10.1016/j.freeradbiomed.2020.06.016>
- 916 Ma, H., Groth, R. D., Cohen, S. M., Emery, J. F., Li, B., Hoedt, E., Zhang, G., Neubert, T. A., &  
917 Tsien, R. W. (2014).  $\gamma$ caMKII shuttles Ca<sup>2+</sup>/CaM to the nucleus to trigger CREB  
918 phosphorylation and gene expression. *Cell*, 159(2), 281–294.  
919 <https://doi.org/10.1016/j.cell.2014.09.019>
- 920 Martelli, A. M., Evangelisti, C., Nyakern, M., & Manzoli, F. A. (2006). Nuclear protein kinase  
921 C. In *Biochimica et Biophysica Acta - Molecular and Cell Biology of Lipids* (Vol. 1761,  
922 Issues 5–6, pp. 542–551). <https://doi.org/10.1016/j.bbalip.2006.02.009>

- 923 Martin, K. C., & Ephrussi, A. (2009). mRNA Localization: Gene Expression in the Spatial  
924 Dimension. In *Cell* (Vol. 136, Issue 4, pp. 719–730).  
925 <https://doi.org/10.1016/j.cell.2009.01.044>
- 926 Matsushashi, S., Hamajima, H., Xia, J. H., Zhang, H., Mizuta, T., Anzai, K., & Ozaki, I. (2014).  
927 Control of a tumor suppressor PDCD4: Degradation mechanisms of the protein in  
928 hepatocellular carcinoma cells. *Cellular Signalling*, *26*(3), 603–610.  
929 <https://doi.org/10.1016/j.cellsig.2013.11.038>
- 930 Matsushashi, S., Manirujjaman, M., Hamajima, H., & Ozaki, I. (2019). Control mechanisms of  
931 the tumor suppressor PDCD4: Expression and functions. In *International Journal of*  
932 *Molecular Sciences* (Vol. 20, Issue 9). <https://doi.org/10.3390/ijms20092304>
- 933 Mengual, E., Arizti, P., Rodrigo, J., Giménez-Amaya, J. M., & Castaño, J. G. (1996).  
934 Immunohistochemical distribution and electron microscopic subcellular localization of the  
935 proteasome in the rat CNS. *Journal of Neuroscience*, *16*(20), 6331–6341.  
936 <https://doi.org/10.1523/jneurosci.16-20-06331.1996>
- 937 Merlet, J., Burger, J., Gomes, J. E., & Pintard, L. (2009). Regulation of cullin-RING E3  
938 ubiquitin-ligases by neddylation and dimerization. In *Cellular and Molecular Life Sciences*  
939 (Vol. 66, Issues 11–12, pp. 1924–1938). <https://doi.org/10.1007/s00018-009-8712-7>
- 940 Mi, H., Muruganujan, A., Ebert, D., Huang, X., & Thomas, P. D. (2019). PANTHER version 14:  
941 More genomes, a new PANTHER GO-slim and improvements in enrichment analysis tools.  
942 *Nucleic Acids Research*, *47*(D1), D419–D426. <https://doi.org/10.1093/nar/gky1038>
- 943 Nakashima, M., Hamajima, H., Xia, J., Iwane, S., Kwaguchi, Y., Eguchi, Y., Mizuta, T.,  
944 Fujimoto, K., Ozaki, I., & Matsushashi, S. (2010). Regulation of tumor suppressor PDCD4  
945 by novel protein kinase C isoforms. *Biochimica et Biophysica Acta - Molecular Cell*  
946 *Research*, *1803*(9), 1020–1027. <https://doi.org/10.1016/j.bbamcr.2010.05.002>
- 947 Narasimhan, M., Rathinam, M., Riar, A., Patel, D., Mummidi, S., Yang, H. S., Colburn, N. H.,  
948 Henderson, G. I., & Mahimainathan, L. (2013). Programmed Cell Death 4 (PDCD4): A  
949 Novel Player in Ethanol-Mediated Suppression of Protein Translation in Primary Cortical  
950 Neurons and Developing Cerebral Cortex. *Alcoholism: Clinical and Experimental*  
951 *Research*, *37*(1), 96–109. <https://doi.org/10.1111/j.1530-0277.2012.01850.x>
- 952 Ning, F., Wang, F., Li, M., Yu, Z., Hao, Y., & Chen, S. (2014). MicroRNA-182 modulates  
953 chemosensitivity of human non-small cell lung cancer to cisplatin by targeting PDCD4.  
954 *Diagnostic Pathology*, *9*(1). <https://doi.org/10.1186/1746-1596-9-143>
- 955 Nonaka, M., Kim, R., Fukushima, H., Sasaki, K., Suzuki, K., Okamura, M., Ishii, Y.,  
956 Kawashima, T., Kamijo, S., Takemoto-Kimura, S., Okuno, H., Kida, S., & Bito, H. (2014).  
957 Region-Specific Activation of CRTCL1-CREB Signaling Mediates Long-Term Fear  
958 Memory. *Neuron*, *84*(1), 92–106. <https://doi.org/10.1016/j.neuron.2014.08.049>
- 959 Polleux, F., Ince-Dunn, G., & Ghosh, A. (2007). Transcriptional regulation of vertebrate axon  
960 guidance and synapse formation. In *Nature Reviews Neuroscience* (Vol. 8, Issue 5, pp. 331–  
961 340). <https://doi.org/10.1038/nrn2118>
- 962 Ramanan, N., Shen, Y., Sarsfield, S., Lemberger, T., Schütz, G., Linden, D. J., & Ginty, D. D.  
963 (2005). SRF mediates activity-induced gene expression and synaptic plasticity but not  
964 neuronal viability. *Nature Neuroscience*, *8*(6), 759–767. <https://doi.org/10.1038/nn1462>
- 965 Schindelin, J., Arganda-Carreras, I., Frise, E., Kaynig, V., Longair, M., Pietzsch, T., Preibisch,  
966 S., Rueden, C., Saalfeld, S., Schmid, B., Tinevez, J. Y., White, D. J., Hartenstein, V.,  
967 Eliceiri, K., Tomancak, P., & Cardona, A. (2012). Fiji: An open-source platform for  
968 biological-image analysis. In *Nature Methods* (Vol. 9, Issue 7, pp. 676–682).

- 969 <https://doi.org/10.1038/nmeth.2019>
- 970 Schlumm, F., Mauceri, D., Freitag, H. E., & Bading, H. (2013). Nuclear calcium signaling  
971 regulates nuclear export of a subset of class iia histone deacetylases following synaptic  
972 activity. *Journal of Biological Chemistry*, 288(12), 8074–8084.  
973 <https://doi.org/10.1074/jbc.M112.432773>
- 974 Schmid, T., Jansen, A. P., Baker, A. R., Hegamyer, G., Hagan, J. P., & Colburn, N. H. (2008).  
975 Translation inhibitor Pdcd4 is targeted for degradation during tumor promotion. *Cancer*  
976 *Research*, 68(5), 1254–1260. <https://doi.org/10.1158/0008-5472.CAN-07-1719>
- 977 Sekeres, M. J., Mercaldo, V., Richards, B., Sargin, D., Mahadevan, V., Woodin, M. A.,  
978 Frankland, P. W., & Josselyn, S. A. (2012). Increasing CRTC1 function in the dentate gyrus  
979 during memory formation or reactivation increases memory strength without compromising  
980 memory quality. *Journal of Neuroscience*, 32(49), 17857–17868.  
981 <https://doi.org/10.1523/JNEUROSCI.1419-12.2012>
- 982 Shiota, M., Izumi, M. H., Tanimoto, A., Takahashi, M., Miyamoto, N., Kashiwagi, E., Kidani,  
983 A., Hirano, G., Masubuchi, D., Fukunaka, Y., Yasuniwa, Y., Naito, S., Nishizawa, S.,  
984 Sasaguri, Y., & Kohno, K. (2009). Programmed cell death protein 4 down-regulates Y-Box  
985 binding protein-1 expression via a direct interaction with twist1 to suppress cancer cell  
986 growth. *Cancer Research*, 69(7), 3148–3156. <https://doi.org/10.1158/0008-5472.CAN-08-2334>
- 987
- 988 Swiech, L., Heidenreich, M., Banerjee, A., Habib, N., Li, Y., Trombetta, J., Sur, M., & Zhang, F.  
989 (2015). In vivo interrogation of gene function in the mammalian brain using CRISPR-Cas9.  
990 *Nature Biotechnology*, 33(1), 102–106. <https://doi.org/10.1038/nbt.3055>
- 991 Ting, L., Rad, R., Gygi, S. P., & Haas, W. (2011). MS3 eliminates ratio distortion in isobaric  
992 multiplexed quantitative proteomics. *Nature Methods*, 8(11), 937–940.  
993 <https://doi.org/10.1038/nmeth.1714>
- 994 Tydlacka, S., Wang, C. E., Wang, X., Li, S., & Li, X. J. (2008). Differential activities of the  
995 ubiquitin-proteasome system in neurons versus glia may account for the preferential  
996 accumulation of misfolded proteins in neurons. *Journal of Neuroscience*, 28(49), 13285–  
997 13295. <https://doi.org/10.1523/JNEUROSCI.4393-08.2008>
- 998 Tyssowski, K. M., DeStefino, N. R., Cho, J. H., Dunn, C. J., Poston, R. G., Carty, C. E., Jones,  
999 R. D., Chang, S. M., Romeo, P., Wurzelmann, M. K., Ward, J. M., Andermann, M. L.,  
1000 Saha, R. N., Dudek, S. M., & Gray, J. M. (2018). Different Neuronal Activity Patterns  
1001 Induce Different Gene Expression Programs. *Neuron*, 98(3), 530-546.e11.  
1002 <https://doi.org/10.1016/j.neuron.2018.04.001>
- 1003 Untergasser, A., Cutcutache, I., Koressaar, T., Ye, J., Faircloth, B. C., Remm, M., & Rozen, S.  
1004 G. (2012). Primer3-new capabilities and interfaces. *Nucleic Acids Research*, 40(15).  
1005 <https://doi.org/10.1093/nar/gks596>
- 1006 Upadhyya, S. C., Ding, L., Smith, T. K., & Hegde, A. N. (2006). Differential regulation of  
1007 proteasome activity in the nucleus and the synaptic terminals. *Neurochemistry*  
1008 *International*, 48(4), 296–305. <https://doi.org/10.1016/j.neuint.2005.11.003>
- 1009 Upadhyya, S. C., Smith, T. K., & Hegde, A. N. (2004). Ubiquitin-proteasome-mediated CREB  
1010 repressor degradation during induction of long-term facilitation. *Journal of Neurochemistry*,  
1011 91(1), 210–219. <https://doi.org/10.1111/j.1471-4159.2004.02707.x>
- 1012 von Mikecz, A. (2006). The nuclear ubiquitin-proteasome system. In *Journal of Cell Science*  
1013 (Vol. 119, Issue 10, pp. 1977–1984). <https://doi.org/10.1242/jcs.03008>
- 1014 Wang, Q., Zhu, J., Wang, Y. W., Dai, Y., Wang, Y. L., Wang, C., Liu, J., Baker, A., Colburn, N.

- 1015 H., & Yang, H. S. (2017). Tumor suppressor Pcd4 attenuates Sin1 translation to inhibit  
1016 invasion in colon carcinoma. *Oncogene*, *36*(45), 6225–62354.  
1017 <https://doi.org/10.1038/onc.2017.228>
- 1018 Wang, Q., & Yang, H. S. (2018). The role of Pcd4 in tumour suppression and protein  
1019 translation. In *Biology of the Cell* (Vol. 110, Issue 8, pp. 169–177).  
1020 <https://doi.org/10.1111/boc.201800014>
- 1021 Wayman, G. A., Impey, S., Marks, D., Saneyoshi, T., Grant, W. F., Derkach, V., & Soderling, T.  
1022 R. (2006). Activity-Dependent Dendritic Arborization Mediated by CaM-Kinase I  
1023 Activation and Enhanced CREB-Dependent Transcription of Wnt-2. *Neuron*, *50*(6), 897–  
1024 909. <https://doi.org/10.1016/j.neuron.2006.05.008>
- 1025 Wedeken, L., Singh, P., & Klempnauer, K. H. (2011). Tumor suppressor protein Pcd4 inhibits  
1026 translation of p53 mRNA. *Journal of Biological Chemistry*, *286*(50), 42855–42862.  
1027 <https://doi.org/10.1074/jbc.M111.269456>
- 1028 Wei, N., Liu, S. S., Chan, K. K. L., & Ngan, H. Y. S. (2012). Tumour suppressive function and  
1029 modulation of programmed cell death 4 (PDCD4) in ovarian cancer. *PLoS ONE*, *7*(1).  
1030 <https://doi.org/10.1371/journal.pone.0030311>
- 1031 West, A. E., & Greenberg, M. E. (2011). Neuronal activity-regulated gene transcription in  
1032 synapse development and cognitive function. In *Cold Spring Harbor Perspectives in*  
1033 *Biology* (Vol. 3, Issue 6, pp. 1–21). <https://doi.org/10.1101/cshperspect.a005744>
- 1034 Yang, H.-S., Cho, M.-H., Zakowicz, H., Hegamyer, G., Sonenberg, N., & Colburn, N. H. (2004).  
1035 A Novel Function of the MA-3 Domains in Transformation and Translation Suppressor  
1036 Pcd4 Is Essential for Its Binding to Eukaryotic Translation Initiation Factor 4A. *Molecular*  
1037 *and Cellular Biology*, *24*(9), 3894–3906. <https://doi.org/10.1128/mcb.24.9.3894-3906.2004>
- 1038 Yang, H.-S., Jansen, A. P., Komar, A. A., Zheng, X., Merrick, W. C., Costes, S., Lockett, S. J.,  
1039 Sonenberg, N., & Colburn, N. H. (2003). The Transformation Suppressor Pcd4 Is a Novel  
1040 Eukaryotic Translation Initiation Factor 4A Binding Protein That Inhibits Translation.  
1041 *Molecular and Cellular Biology*, *23*(1), 26–37. [https://doi.org/10.1128/mcb.23.1.26-](https://doi.org/10.1128/mcb.23.1.26-37.2003)  
1042 [37.2003](https://doi.org/10.1128/mcb.23.1.26-37.2003)
- 1043 Yang, H.-S., Matthews, C. P., Clair, T., Wang, Q., Baker, A. R., Li, C.-C. H., Tan, T.-H., &  
1044 Colburn, N. H. (2006). Tumorigenesis Suppressor Pcd4 Down-Regulates Mitogen-  
1045 Activated Protein Kinase Kinase Kinase Kinase 1 Expression To Suppress Colon  
1046 Carcinoma Cell Invasion. *Molecular and Cellular Biology*, *26*(4), 1297–1306.  
1047 <https://doi.org/10.1128/mcb.26.4.1297-1306.2006>
- 1048 Yap, E. L., & Greenberg, M. E. (2018). Activity-Regulated Transcription: Bridging the Gap  
1049 between Neural Activity and Behavior. In *Neuron* (Vol. 100, Issue 2, pp. 330–348).  
1050 <https://doi.org/10.1016/j.neuron.2018.10.013>
- 1051 Ye, J., Coulouris, G., Zaretskaya, I., Cutcutache, I., Rozen, S., & Madden, T. L. (2012). Primer-  
1052 BLAST: a tool to design target-specific primers for polymerase chain reaction. *BMC*  
1053 *Bioinformatics*, *13*, 134. <https://doi.org/10.1186/1471-2105-13-134>



**Figures:**

**Figure 1**

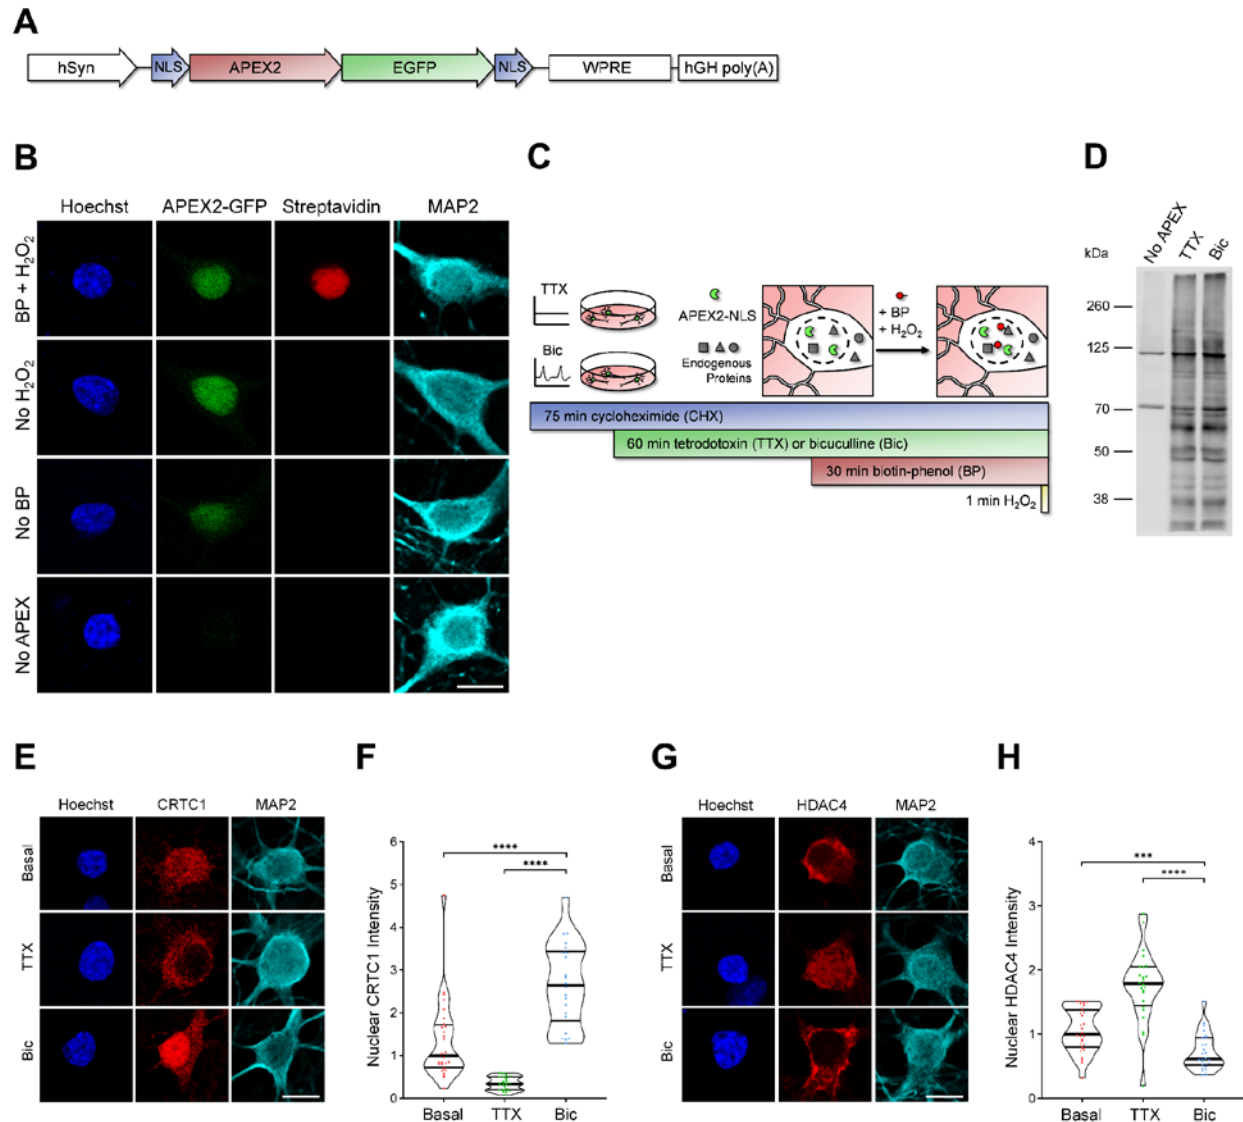

**Figure 1. Identification of the nuclear proteomes from silenced and stimulated neurons using APEX2 proximity biotinylation.**

**A)** Design of APEX2-NLS construct. hSyn = human synapsin promoter, NLS = SV40 nuclear localization signal.

**B)** Immunocytochemistry (ICC) of cultured rat forebrain neurons after APEX2 proximity biotinylation labeling. Nuclear proteins were biotinylated (streptavidin, red) by the combined presence of APEX2-NLS (GFP, green), biotin-phenol (BP), and H<sub>2</sub>O<sub>2</sub>. Scale bar = 10 μm.

**C)** Workflow for labeling nuclear proteins from silenced and stimulated neurons. APEX2 labeling diagram based on (Hung et al., 2016).

**D)** Western blot of cultured neuron protein lysates from No APEX, APEX+TTX, or APEX+Bic conditions, stained with streptavidin.

**E)** CRTC1 ICC of basal, TTX-silenced, and Bic-stimulated neurons. Scale bar = 10  $\mu$ m.

**F)** Violin plots of normalized nuclear CRTC1 ICC intensity. Basal n = 28, TTX n = 21, Bic n = 22 cells, from 1 set of cultures.

**G)** HDAC4 ICC of basal, TTX-silenced, and Bic-stimulated neurons. Scale bar = 10  $\mu$ m.

**H)** Violin plots of normalized nuclear HDAC4 ICC intensity. Basal n = 28, TTX n = 24, Bic n = 26 cells, from 1 set of cultures.

Statistical significance is indicated by \*\*\*p < 0.001 and \*\*\*\*p < 0.0001, from Mann-Whitney U test with Bonferroni correction.

## Figure 2

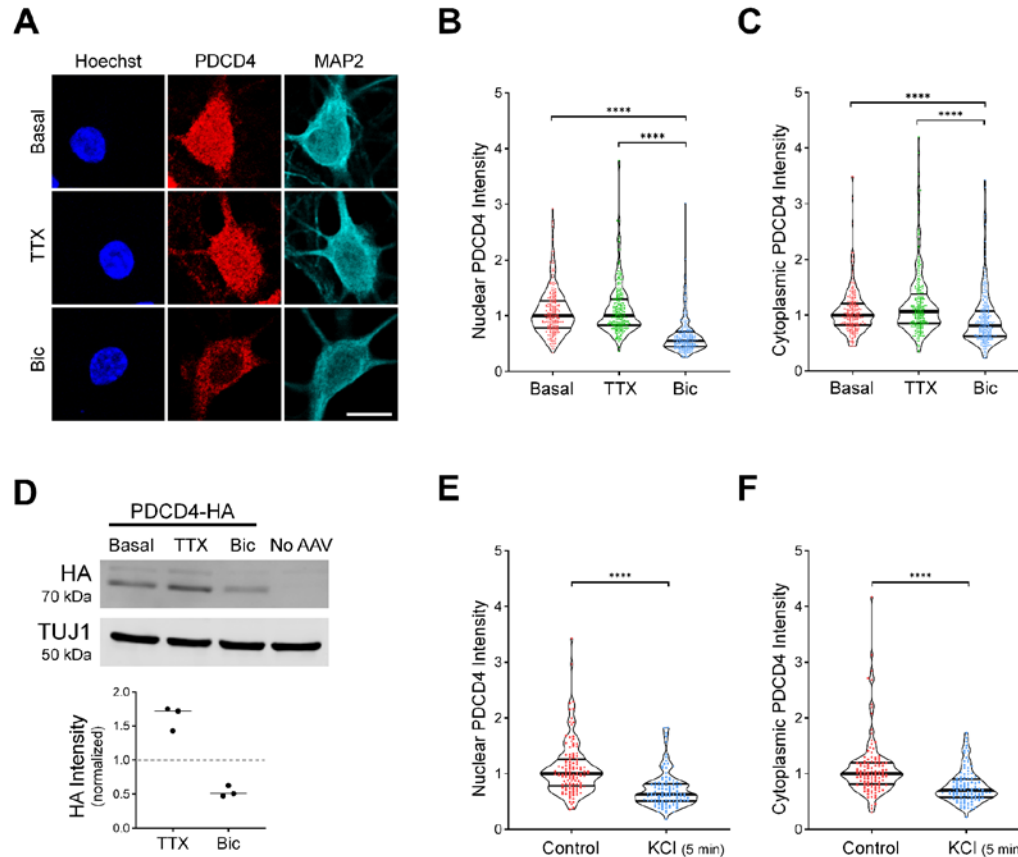

### Figure 2. Neuronal stimulation decreases PDCD4 protein concentration in the nucleus and cytoplasm of neurons.

**A)** PDCD4 immunocytochemistry (ICC) of basal, TTX-silenced, and Bic-stimulated neurons. Scale bar = 10  $\mu$ m.

**B)** Violin plots of normalized nuclear PDCD4 ICC intensity. Basal n = 226, TTX n = 227, Bic n = 218 cells, from 6 sets of cultures.

**C)** Violin plots of normalized cytoplasmic PDCD4 ICC intensity in the same cells as in B.

**D)** Top: Western blot of protein lysates from basal, TTX-silenced, and Bic-stimulated neurons transduced with PDCD4-HA AAV. Bottom: Quantification of western blot, from 3 sets of cultures. HA intensity was normalized to TUJ1 intensity. Within each experiment, all samples were normalized to the basal sample.

**E)** Violin plots of normalized nuclear PDCD4 ICC intensity. Control n = 118, KCl n = 110 cells, from 3 sets of cultures.

**F)** Violin plots of normalized cytoplasmic PDCD4 ICC intensity in the same cells as in G. Statistical significance is indicated by \*\*p < 0.01, \*\*\*p < 0.001, and \*\*\*\*p < 0.0001, from Mann-Whitney U test with Bonferroni correction.

**Figure 3**

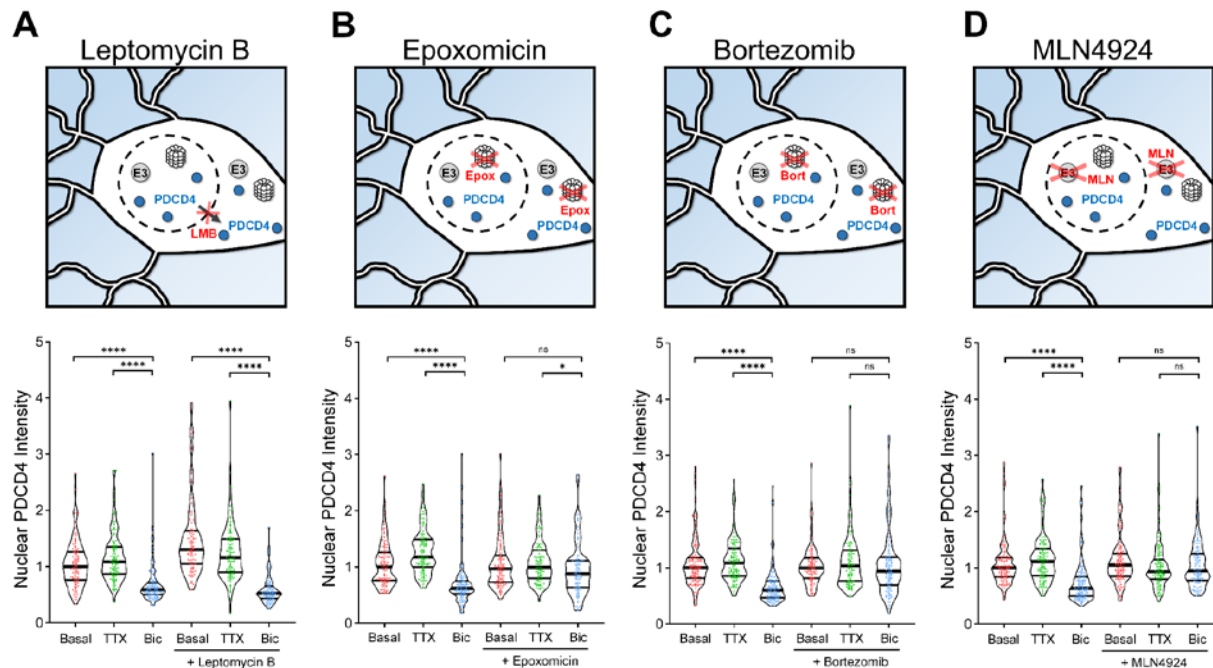

**Figure 3. PDCD4 undergoes proteasome-mediated degradation –not nuclear export– following neuronal stimulation.**

**A)** Top: Schematic of CRM1-mediated nuclear export inhibitor leptomycin B (LMB) experiments. Bottom: Violin plots of normalized nuclear PDCD4 immunocytochemistry (ICC) intensity. Basal n = 109, TTX n = 109, Bic n = 109, LMB-Basal n = 106, LMB-TTX n = 100, LMB-Bic n = 86 cells, from 3 sets of cultures.

**B)** Top: Schematic of proteasome inhibitor epoxomicin (epox) experiments. Bottom: Violin plots of normalized nuclear PDCD4 ICC intensity. Basal n = 113, TTX n = 106, Bic n = 103, Epox-Basal n = 107, Epox-TTX n = 94, Epox-Bic n = 86 cells, from 3 sets of cultures.

**C)** Top: Schematic of proteasome inhibitor bortezomib (bort) experiments. Bottom: Violin plots of normalized nuclear PDCD4 ICC intensity. Basal n = 131, TTX n = 111, Bic n = 120, Bort-Basal n = 100, Bort-TTX n = 98, Bort-Bic n = 116 cells, from 3 sets of cultures.

**D)** Top: Schematic of MLN4924 (MLN) experiments. MLN4924 inhibits neddylation, preventing the activation of Cullin-RING E3 ubiquitin ligases. Bottom: Violin plots of normalized nuclear PDCD4 ICC intensity. Basal n = 130, TTX n = 120, Bic n = 120, MLN-Basal n = 115, MLN-TTX n = 108, MLN-Bic n = 97 cells, from 3 sets of cultures.

Statistical significance is indicated by \*p < 0.05 and \*\*\*\*p < 0.0001, from Mann-Whitney U test with Bonferroni correction.

## Figure 4

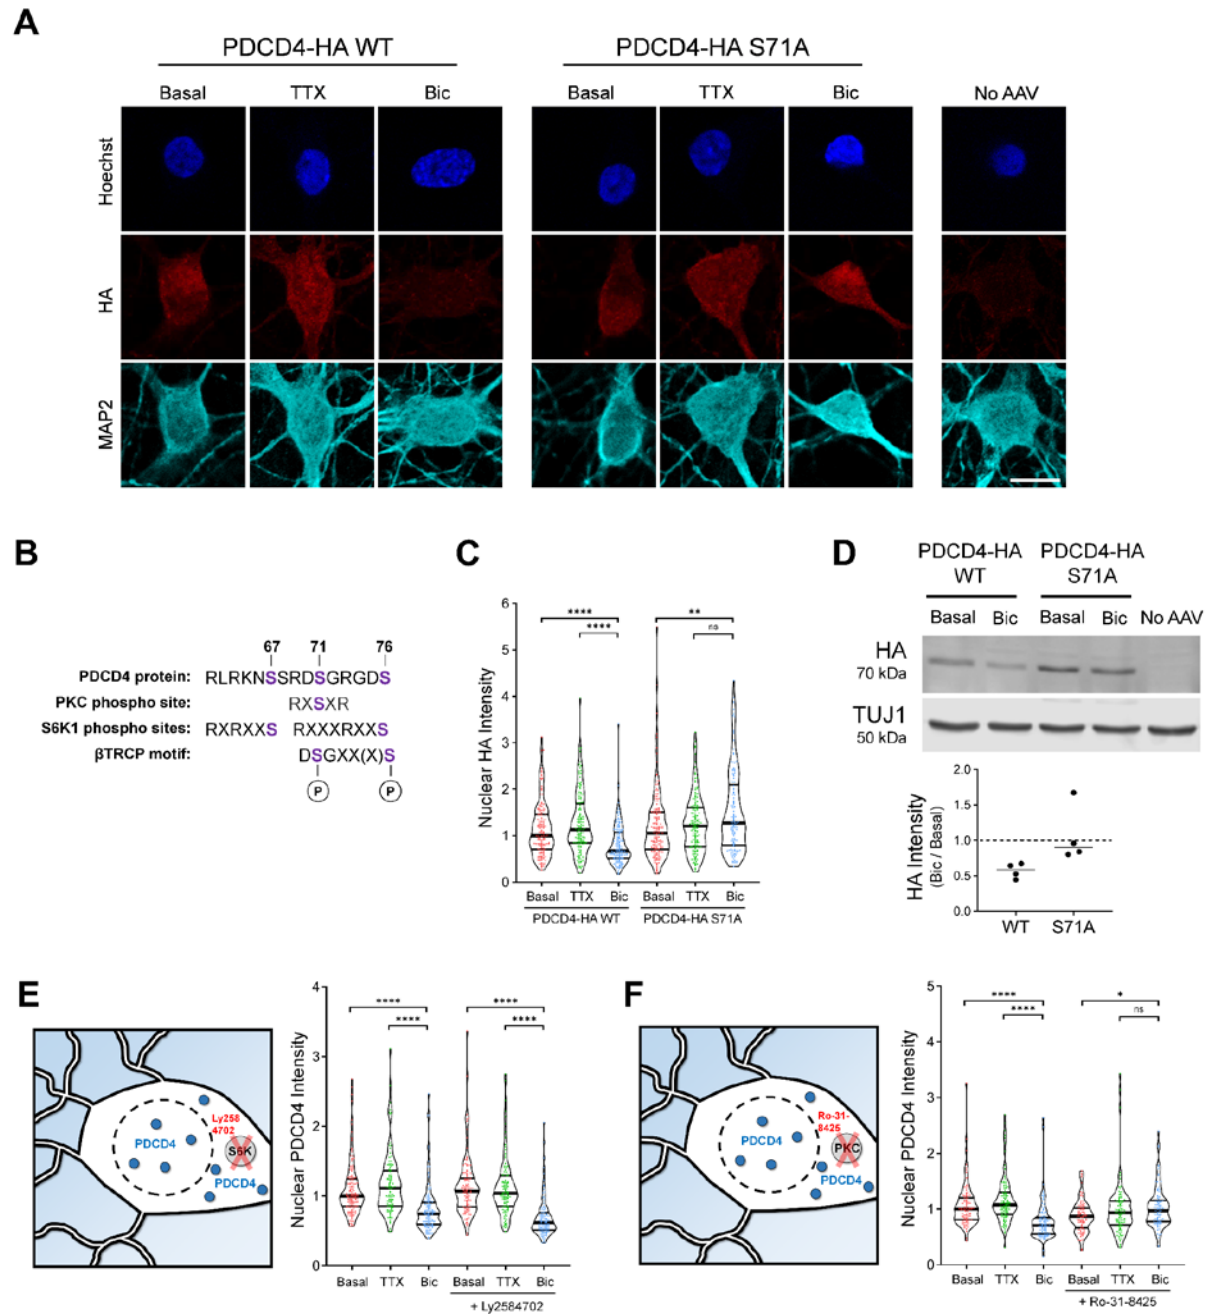

**Figure 4. PDCD4 S71A mutation and PKC inhibition prevent the activity-dependent decrease of PDCD4.**

A) HA immunocytochemistry (ICC) of basal, TTX-silenced, and Bic-stimulated neurons transduced with PDCD4-HA WT, PDCD4-HA S71A AAV, or No AAV (negative control). Scale bar = 10  $\mu$ m.

**B)** PDCD4 protein sequence (amino acids 62-76). PKC and S6K1 phosphorylation sites are indicated in purple. Adapted from (Matsuhashi et al., 2019).

**C)** Violin plots of normalized nuclear HA ICC intensity. WT-Basal n = 144, WT-TTX n = 136, WT-Bic n = 147, S71A-Basal n = 158, S71A-TTX n = 140, S71A-Bic n = 122 cells, from 4 sets of cultures.

**D)** Top: Western blot of protein lysates from basal and Bic-stimulated neurons transduced with PDCD4-HA WT or PDCD4-HA S71A. Bottom: Quantification of western blot, from 4 sets of cultures. HA intensity was normalized to TUJ1 intensity. Within each experiment, each Bic sample was normalized to its respective basal sample.

**E)** Left: Schematic of S6K inhibitor Ly2584702 (LY) experiments. Right: Violin plots of normalized nuclear PDCD4 ICC intensity. Basal n = 138, TTX n = 104, Bic n = 122, LY-Basal n = 112, LY-TTX n = 112, LY-Bic n = 107 cells, from 3 sets of cultures.

**F)** Left: Schematic of PKC inhibitor Ro-31-8425 (Ro) experiments. Right: Violin plots of normalized nuclear PDCD4 ICC intensity. Basal n = 101, TTX n = 101, Bic n = 96, Ro-Basal n = 81, Ro-TTX n = 95, Ro-Bic n = 87 cells, from 3 sets of cultures.

Statistical significance is indicated by \*p < 0.05, \*\*p < 0.01, and \*\*\*\*p < 0.0001, from Mann-Whitney U test with Bonferroni correction.

## Figure 5

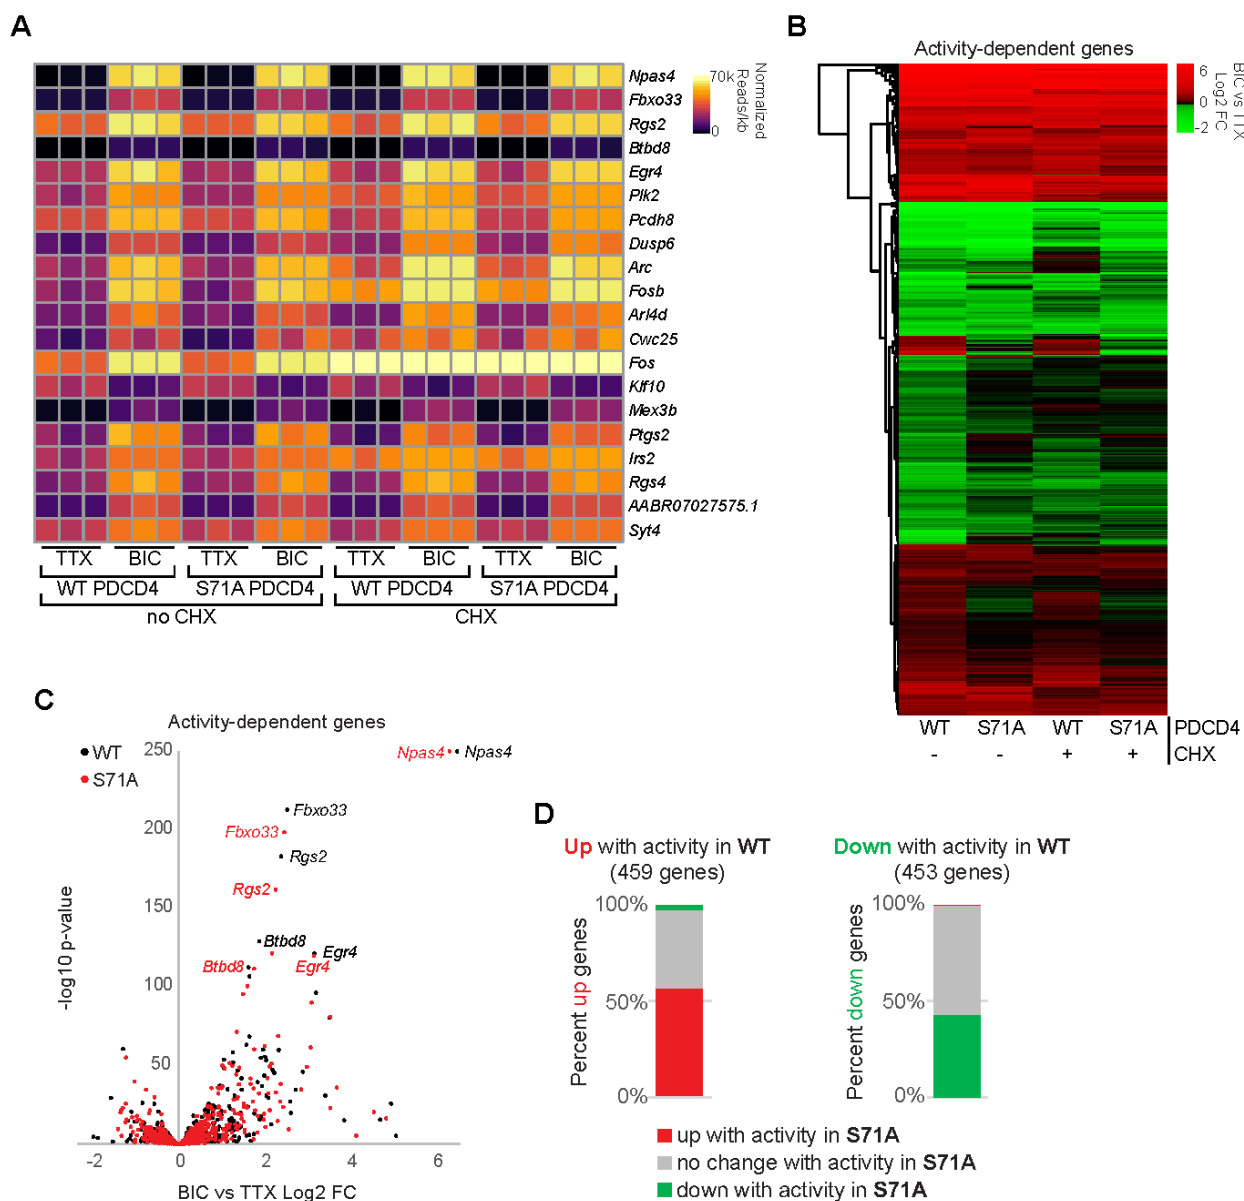

**Figure 5. Stimulus-induced degradation of PDCD4 regulates the expression of neuronal activity-dependent genes.**

**A)** For each biological replicate, normalized read counts (from DESeq2) divided by transcript length are shown for the top 20 activity-dependent genes, ranked by adjusted p-value for PDCD4 WT no CHX samples. Each row represents a gene, and each column represents a biological replicate. The color of each box indicates transcript abundance (note: color is not scaled linearly in order to display full range of read counts; see **Table S2** for full dataset).

**B)** Stimulation-induced log<sub>2</sub> fold change (FC) for all 912 activity-dependent genes, clustered by fold change across sample type. Each row represents a gene and each column represents a

sample type. The color legend represents Bic vs TTX log<sub>2</sub>FC with red representing upregulation, green representing downregulation, and black indicating log<sub>2</sub>FC of zero.

**C)** For each activity-dependent gene, Bic versus TTX log<sub>2</sub>FC is plotted against -log<sub>10</sub> of adjusted p-value, from PDCD4 WT samples (black) and PDCD4 S71A samples (red). Gene names for the top five activity-dependent genes by adjusted p-value are labeled. For both PDCD4 WT and PDCD4 S71A samples, *Npas4* Bic vs TTX adjusted p-value was zero (-log<sub>10</sub> of zero is not defined), therefore for display, the -log<sub>10</sub> adjusted p-value for *Npas4* was set to 250 for both samples.

**D)** Activity-dependent upregulated genes (left bar) and activity-dependent downregulated genes (right bar) were categorized by the activity-dependent differential expression in PDCD4 S71A samples. The colors in each bar show the percentage of activity-dependent genes showing activity-dependent upregulation (red), no change (gray) or downregulation (green) in PDCD4 S71A samples.



## Figure 6

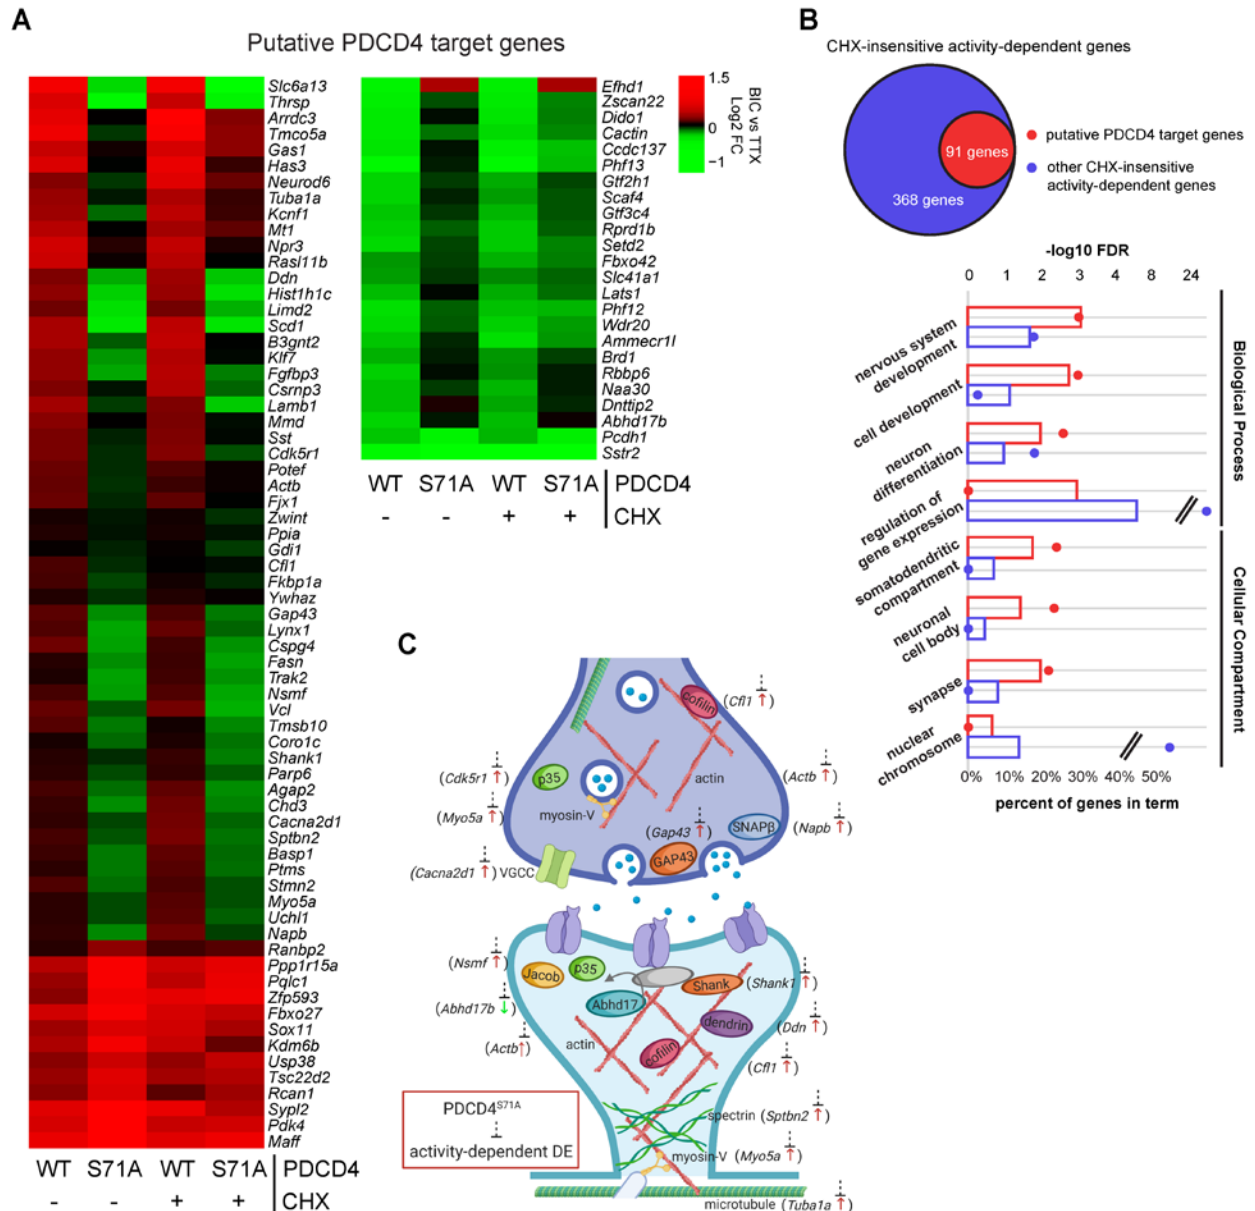

**Figure 6. Degradation-resistant PDCD4 suppresses activity-dependent changes in expression of synaptic genes.**

**A)** Bic versus TTX log<sub>2</sub>FC for all 91 putative PDCD4 transcriptional regulation target genes, clustered by fold change across sample type. Each row represents a gene, and each column represents a sample type. The color legend represents Bic vs TTX log<sub>2</sub>FC with red representing upregulation, green representing downregulation, and black indicating a log<sub>2</sub>FC of zero.

**B)** GO analysis -log<sub>10</sub> false discovery rate (FDR; circles) and percent of genes (bars) in terms from Biological Process (top four terms) and Cellular Compartment (bottom four terms) analyses (Ashburner et al., 2000; Carbon et al., 2019; Mi et al., 2019). Data from putative PDCD4 target

genes (91 genes) are shown in red and for comparison, data from other CHX-insensitive activity-dependent genes (368 genes) are shown in blue. Select GO terms are shown for simplicity (see **Table S3** for top 15 GO terms by FDR for both groups of genes).

**C)** Diagram depicting a generic synapse and synaptic proteins. The labeled synaptic proteins are encoded by putative PDCD4 target genes (gene name indicated in parenthesis alongside protein). The activity-dependent changes in expression of these genes are inhibited by degradation-resistant PDCD4. The presynaptic terminal is shown above with neurotransmitter-loaded synaptic vesicles, and the postsynaptic terminal is shown below with neurotransmitter receptors in the postsynaptic membrane (one receptor is shown anchored to an unlabeled gray PSD-95 protein). Arrow next to gene name illustrates the direction of activity-dependent differential expression and dashed line with bar illustrates the suppression of this activity-dependent change in the PDCD4 S71A samples.

Supplemental Information:

Figure S1

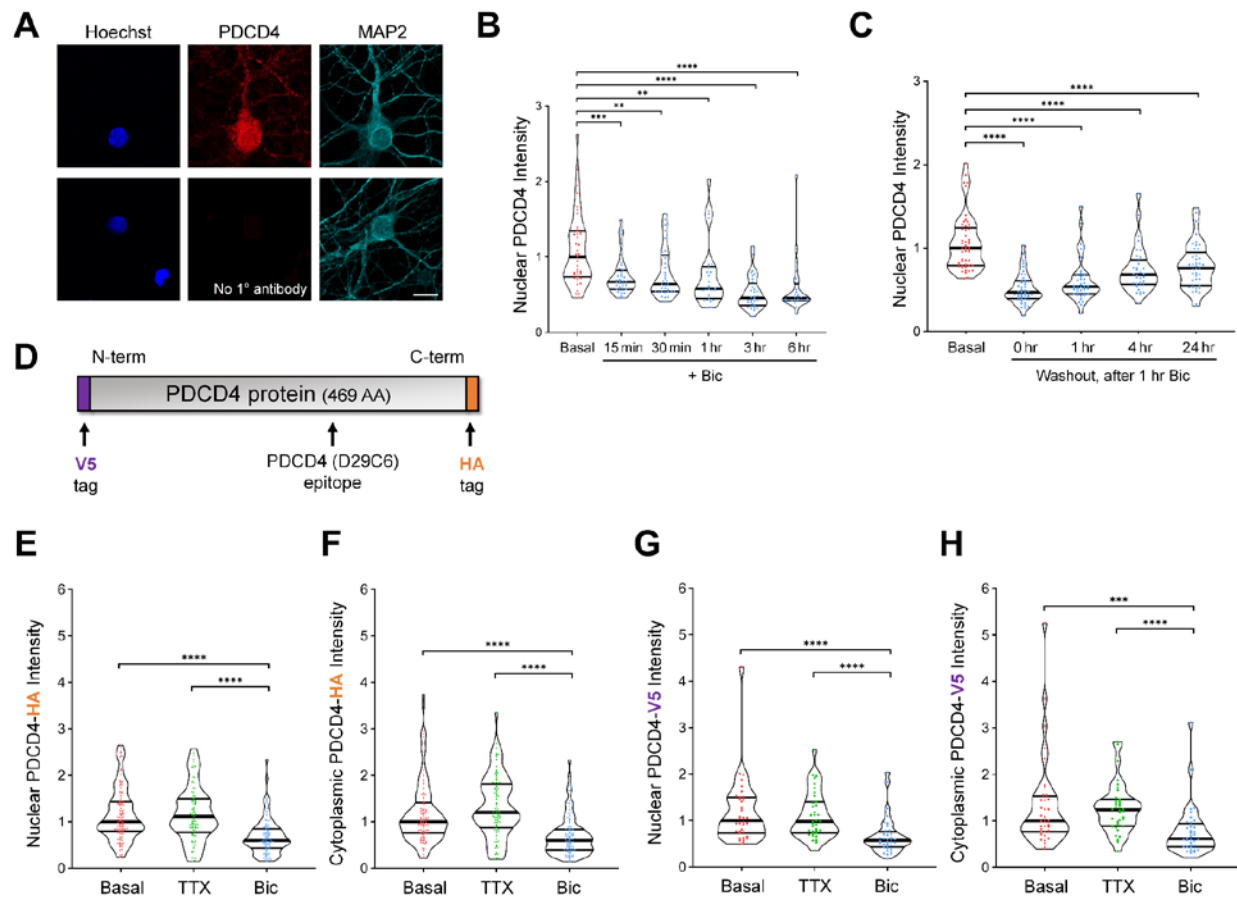

**Figure S1. Relating to Figure 2: Neuronal stimulation decreases PDCD4 protein concentration in the nucleus and cytoplasm of neurons.**

**A)** Top: immunocytochemistry (ICC) of endogenous PDCD4 protein. Bottom: negative control (no primary antibody). Scale bar = 10  $\mu$ m.

**B)** Violin plots of normalized nuclear PDCD4 ICC intensity after varying durations of Bic stimulation. Basal n = 39, Bic 15 min n = 36, 30 min n = 33, 1 hr n = 26, 3 hr n = 32, 6 hr n = 28 cells, from 1 set of cultures. Basal median = 1.00, Bic 15 min median = 0.67, 30 min median = 0.64, 1 hr median = 0.58, 3 hr median = 0.46, 6 hr median = 0.46. Basal vs Bic 15 min p = 0.0005, Basal vs Bic 30 min p = 0.007, Basal vs Bic 1 hr p = 0.0035, Basal vs Bic 3 hr p < 0.0001, Basal vs Bic 6 hr p < 0.0001.

**C)** Violin plots of normalized nuclear PDCD4 ICC intensity at various timepoints after removal of a 1 hr Bic stimulation. Basal n = 49, Washout 0 hr n = 44, 1 hr n = 40, 4 hr n = 34, 24 hr n = 41 cells, from 1 set of cultures. Basal median = 1.00, Washout 0 hr median = 0.47, 1 hr median = 0.54, 4 hr median = 0.68, 24 hr median = 0.76. Basal vs 0 hr p < 0.0001, Basal vs 1 hr p < 0.0001, Basal vs 4 hr p < 0.0001, Basal vs 24 hr p < 0.0001.

- D)** PDCD4 protein, with locations of V5 tag, HA tag, and PDCD4 (D29C6) epitope (recognized by the PDCD4 Cell Signaling Technology antibody used in this study).
- E)** Violin plots of normalized nuclear HA ICC intensity in neurons transduced with PDCD4-HA AAV. Basal n = 107, TTX n = 88, Bic n = 102 cells, from 3 sets of cultures. Basal median = 1.00, TTX median = 1.116, Bic median = 0.5972. Basal vs Bic  $p < 0.0001$ , TTX vs Bic  $p < 0.0001$ .
- F)** Violin plots of normalized cytoplasmic HA ICC intensity in the same cells as in C. Basal median = 1.00, TTX median = 1.203, Bic median = 0.5983. Basal vs Bic  $p < 0.0001$ , TTX vs Bic  $p < 0.0001$ .
- G)** Violin plots of normalized nuclear V5 ICC intensity in neurons transfected with V5-PDCD4 plasmid and co-transfected with GFP plasmid as a transfection marker. Basal n = 36, TTX n = 36, Bic n = 36 cells, from 2 sets of cultures. For each cell, the nuclear V5 intensity was normalized to the nuclear GFP intensity, in order to normalize for differences in transfection efficiency between cells. Basal median = 1.00, TTX median = 0.9810, Bic median = 0.5760. Basal vs Bic  $p < 0.0001$ , TTX vs Bic  $p < 0.0001$ .
- H)** Violin plots of normalized cytoplasmic V5 ICC intensity in the same cells as in E. For each cell, the cytoplasmic V5 intensity was normalized to the nuclear GFP intensity, in order to normalize for differences in transfection efficiency between cells. Basal median = 1.00, TTX median = 1.237, Bic median = 0.6167. Basal vs Bic  $p = 0.0002$ , TTX vs Bic  $p < 0.0001$ . Statistical significance is indicated by \*\*\* $p < 0.001$  and \*\*\*\* $p < 0.0001$ , from Mann-Whitney U test with Bonferroni correction.

## Figure S2

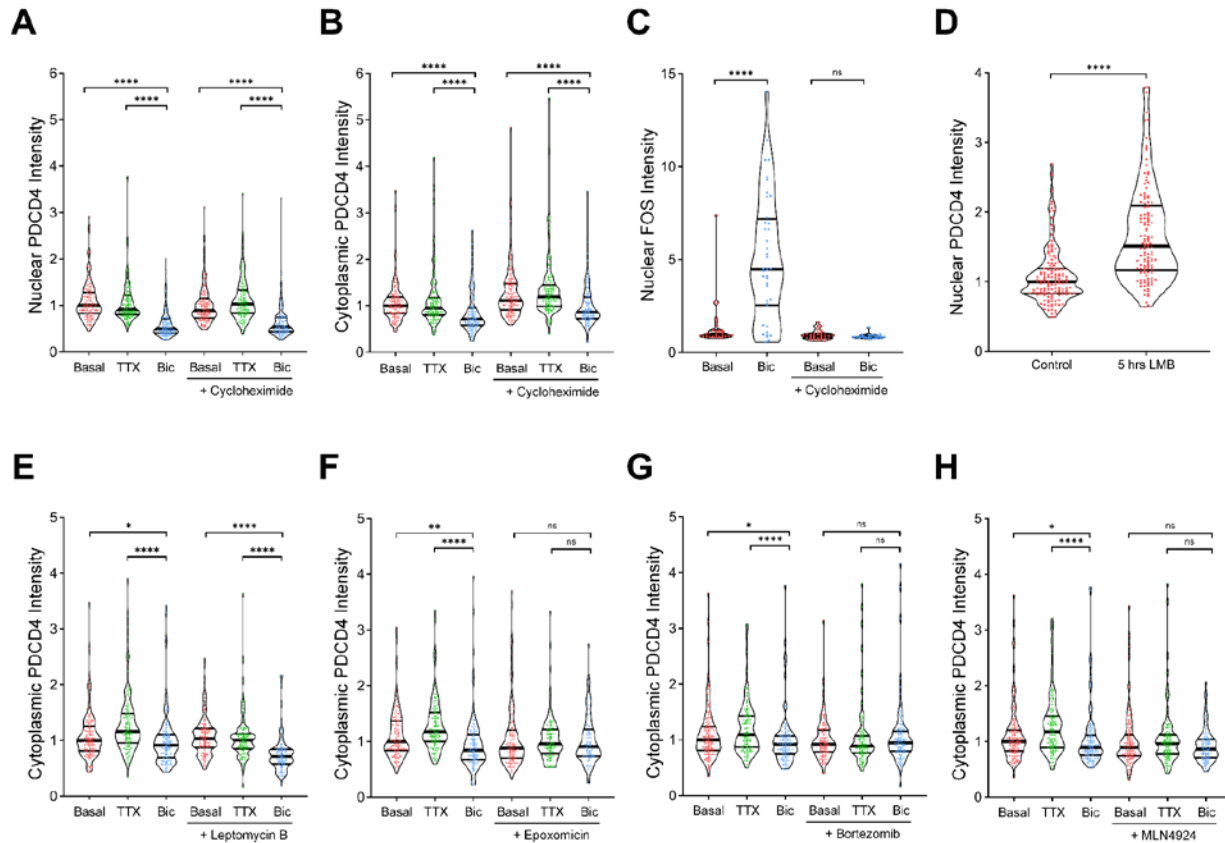

### Figure S2. Relating to Figure 3: PDCD4 undergoes proteasome-mediated degradation –not nuclear export– following neuronal stimulation.

**A)** Violin plots of normalized nuclear PDCD4 immunocytochemistry (ICC) intensity. Basal  $n = 117$ , TTX  $n = 118$ , Bic  $n = 109$ , CHX-Basal  $n = 123$ , CHX-TTX  $n = 120$ , CHX-Bic  $n = 104$  cells, from 3 sets of cultures. Basal median = 1.00, TTX median = 0.9119, Bic median = 0.4924, CHX-Basal median = 0.8890, CHX-TTX median = 1.033, CHX-Bic median = 0.5375. Basal vs Bic  $p < 0.0001$ , TTX vs Bic  $p < 0.0001$ , CHX-Basal vs CHX-Bic  $p < 0.0001$ , CHX-TTX vs CHX-Bic  $p < 0.0001$ .

**B)** Violin plots of normalized cytoplasmic PDCD4 ICC intensity in the same cells as in A. Basal median = 1.00, TTX median = 0.9501, Bic median = 0.7138, CHX-Basal median = 1.112, CHX-TTX median = 1.191, CHX-Bic median = 0.8626. Basal vs Bic  $p < 0.0001$ , TTX vs Bic  $p < 0.0001$ , CHX-Basal vs CHX-Bic  $p < 0.0001$ , CHX-TTX vs CHX-Bic  $p < 0.0001$ .

**C)** Violin plots of normalized nuclear FOS ICC intensity. Basal  $n = 28$ , Bic  $n = 40$  cells, CHX-Basal  $n = 32$ , CHX-Bic  $n = 26$  cells, from 1 set of cultures. Basal median = 1.00, Bic median = 4.484, CHX-Basal median = 0.8941, CHX-Bic median = 0.8307. Basal vs Bic  $p < 0.0001$ , CHX-Basal vs CHX-Bic  $p = 0.3064$ .

**D)** Violin plots of normalized nuclear PDCD4 ICC intensity. Control n = 137, LMB n = 122 cells, from 3 sets of cultures. Control median = 1.00, LMB median = 1.513. Control vs LMB p < 0.0001.

**E)** Violin plots of normalized cytoplasmic PDCD4 ICC intensity in the same cells as in **Fig 3A**. Basal median = 1.00, TTX median = 1.158, Bic median = 0.9127, LMB-Basal median = 1.031, LMB-TTX median = 1.005, LMB-Bic median = 0.7122. Basal vs Bic p = 0.034, TTX vs Bic p < 0.0001, LMB-Basal vs LMB-Bic p < 0.0001, LMB-TTX vs LMB-Bic p < 0.0001.

**F)** Violin plots of normalized cytoplasmic PDCD4 ICC intensity in the same cells as in **Fig 3B**. Basal median = 1.00, TTX median = 1.174, Bic median = 0.8439, Epox-Basal median = 0.8789, Epox-TTX median = 0.9596, Epox-Bic median = 0.9077. Basal vs Bic p = 0.001, TTX vs Bic p < 0.0001, Epox-Basal vs Epox-Bic p = 1, Epox-TTX vs Epox-Bic p = 0.8258.

**G)** Violin plots of normalized cytoplasmic PDCD4 ICC intensity in the same cells as in **Fig 3C**. Basal median = 1.00, TTX median = 1.093, Bic median = 0.9226, Bort-Basal median = 0.9229, Bort-TTX median = 0.8904, Bort-Bic median = 0.9472. Basal vs Bic p = 0.0156, TTX vs Bic p < 0.0001, Bort-Basal vs Bort-Bic p = 1, Bort-TTX vs Bort-Bic p = 0.3544.

**H)** Violin plots of normalized cytoplasmic PDCD4 ICC intensity in the same cells as in **Fig 3D**. Basal median = 1.00, TTX median = 1.173, Bic median = 0.8955, MLN-Basal median = 0.8940, MLN-TTX median = 0.9603, MLN-Bic median = 0.8633. Basal vs Bic p = 0.0324, TTX vs Bic p < 0.0001, MLN-Basal vs MLN-Bic p = 0.6294, MLN-TTX vs MLN-Bic p = 0.11.

Statistical significance is indicated by \*p < 0.05, \*\*p < 0.01, and \*\*\*\*p < 0.0001, from Mann-Whitney U test with Bonferroni correction.

## Figure S3

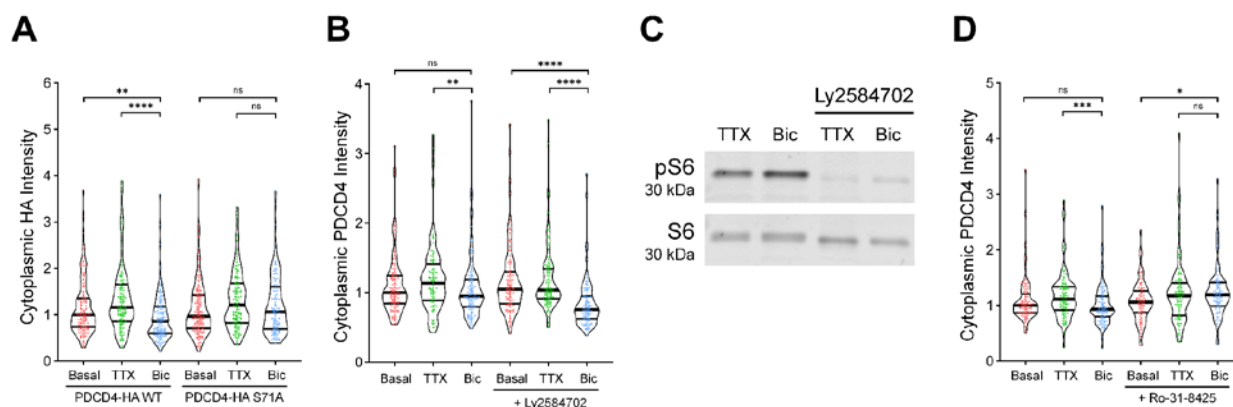

### Figure S3. Relating to Figure 4: PDCD4 S71A mutation and PKC inhibition prevent the activity-dependent decrease of PDCD4.

**A)** Violin plots of normalized cytoplasmic HA immunocytochemistry (ICC) intensity in the same cells as in **Fig 4C**. WT-Basal median = 1.00, WT-TTX median = 1.161, WT-Bic median = 0.8621, S71A-Basal median = 0.9676, S71A-TTX median = 1.209, S71A-Bic median = 1.063. WT-Basal vs WT-Bic  $p = 0.0012$ , WT-TTX vs WT-Bic  $p < 0.0001$ , S71A-Basal vs S71A-Bic  $p = 0.6704$ , S71A-TTX vs S71A-Bic  $p = 0.2012$ .

**B)** Violin plots of normalized cytoplasmic PDCD4 ICC intensity in the same cells as in **Fig 4E**. Basal median = 1.00, TTX median = 1.14, Bic median = 0.95, LY-Basal median = 1.05, LY-TTX median = 1.04, LY-Bic median = 0.76. Basal vs Bic  $p = 0.4742$ , TTX vs Bic  $p = 0.0088$ , LY-Basal vs LY-Bic  $p < 0.0001$ , LY-TTX vs LY-Bic  $p < 0.0001$ .

**C)** Western blot of protein lysates from neurons treated with or without LY2584702, from 1 set of cultures. Western blot was stained with antibodies for phospho-S6 (ser 235/236) and total S6 to confirm that LY2584702 inhibits S6K activity.

**D)** Violin plots of normalized cytoplasmic PDCD4 ICC intensity in the same cells as in **Fig 4F**. Basal median = 1.00, TTX median = 1.114, Bic median = 0.9326, Ro-Basal median = 1.059, Ro-TTX median = 1.172, Ro-Bic median = 1.195. Basal vs Bic  $p = 0.2592$ , TTX vs Bic  $p = 0.0008$ , Ro-Basal vs Ro-Bic  $p = 0.0118$ , Ro-TTX vs Ro-Bic  $p = 0.9892$ .

Statistical significance is indicated by \* $p < 0.05$ , \*\* $p < 0.01$ , \*\*\* $p < 0.001$ , and \*\*\*\* $p < 0.0001$ , from Mann-Whitney U test with Bonferroni correction.

## Figure S4

**A**

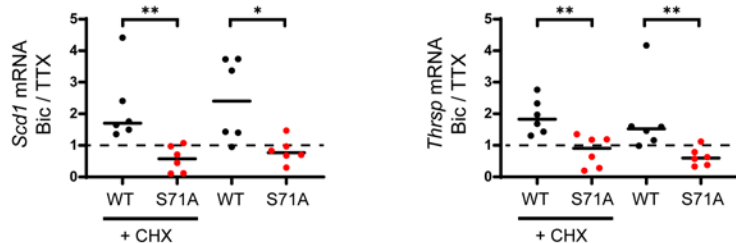

**B**

### Activity-dependent upregulated genes

#### Promoters of putative PDCD4 target genes

| Motif | % in targets: background | P-value |
|-------|--------------------------|---------|
|       | JunD 12:2                | 1E-4    |
|       | TATA-Box 42:22           | 1E-3    |
|       | Klf4 30:13               | 1E-3    |
|       | Klf5 66:46               | 1E-3    |
|       | Sp1 36:20                | 1E-2    |
|       | cJun 15:5                | 1E-2    |
|       | CRE 15:5                 | 1E-2    |
|       | NFY 31:18                | 1E-2    |
|       | Isl1 45:29               | 1E-2    |
|       | Atf2 15:6                | 1E-2    |

#### Promoters of other CHX-insensitive genes

| Motif | % in targets: background | P-value |
|-------|--------------------------|---------|
|       | CRE 23:6                 | 1E-15   |
|       | JunD 13:2                | 1E-15   |
|       | Atf1 30:12               | 1E-13   |
|       | cJun 16:5                | 1E-9    |
|       | Atf7 21:8                | 1E-8    |
|       | Atf2 17:6                | 1E-8    |
|       | NFY 33:17                | 1E-8    |
|       | Sp1 36:22                | 1E-6    |
|       | Klf5 61:46               | 1E-5    |
|       | TATA-Box 36:22           | 1E-5    |

### Activity-dependent downregulated genes

#### Promoters of putative PDCD4 target genes

no significant motifs  
(too few genes)

#### Promoters of other CHX-insensitive genes

| Motif | % in targets: background | P-value |
|-------|--------------------------|---------|
|       | Nrf 23:8                 | 1E-6    |
|       | Nrf1 20:8                | 1E-5    |
|       | Sp1 34:18                | 1E-4    |
|       | Gfy-Staf 8:2             | 1E-3    |
|       | Klf4 24:13               | 1E-3    |
|       | Klf5 55:42               | 1E-2    |
|       | Gfy 6:2                  | 1E-2    |
|       | Elk4 30:20               | 1E-2    |



**Figure S4. Relating to Figures 5-6: Stimulus-induced degradation of PDCD4 regulates the expression of neuronal activity-dependent genes.**

**A)** RT-qPCR of putative PDCD4 target genes, *Scd1* and *Thrsp*, from TTX-silenced and Bic-stimulated neurons that were transduced with PDCD4 WT or S71A, from 6 sets of cultures. Samples were normalized using two housekeeping genes, *Hprt* and *Gapdh*. The abundance of the target gene in each Bic sample was normalized to its respective TTX sample. *Scd1* WT CHX median = 1.702, *Scd1* S71A CHX median = 0.5776, *Scd1* WT median = 2.401, *Scd1* S71A median = 0.7672, *Thrsp* WT CHX median = 1.826, *Thrsp* S71A CHX median = 0.9080, *Thrsp* WT median = 1.522, *Thrsp* S71A median = 0.5995. *Scd1* CHX WT vs CHX S71A  $p = 0.0022$ , *Scd1* WT vs S71A  $p = 0.0260$ , *Thrsp* CHX WT vs CHX S71A  $p = 0.0043$ , *Thrsp* WT vs S71A  $p = 0.0043$ . Statistical significance is indicated by \* $p < 0.05$  and \*\* $p < 0.01$ , from Mann-Whitney U test.

**B)** Motif analyses of promoters of putative PDCD4 target genes (left column) and for comparison, other CHX-insensitive activity-dependent genes (right column) using HOMER software (Heinz et al., 2010). The top panel shows the motif image logos, enrichment, and p-values for the top ten motifs by p-value for activity-dependent upregulated genes, and the bottom panel shows the same but for activity-dependent downregulated genes (only 8 motifs were significant for down-regulated genes).

## Figure S5

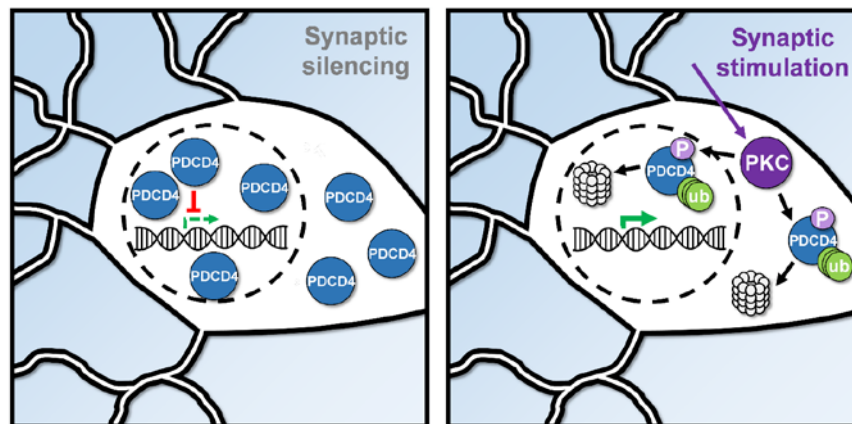

**Figure S5. Summary diagram of the activity-dependent proteasome-mediated degradation of PDCD4.**

In silenced neurons (left), PDCD4 is highly expressed and suppresses the expression of specific genes. In stimulated neurons (right), PDCD4 is phosphorylated by PKC and undergoes proteasome-mediated degradation, thereby facilitating the expression of specific genes important for neuron synaptic function.

## **Supplementary Tables:**

### **Table S1. APEX2-NLS Mass Spectrometry of TTX-silenced and Bic-stimulated neurons.**

Mass spectrometry data from the nuclear proteomes of TTX-silenced and Bic-stimulated forebrain cultures, as detected by APEX2 proximity biotinylation. All proteins detected in study (Sheet 1), proteins enriched above the No APEX negative control (Sheet 2), and candidate proteins with differential Bic vs TTX expression (Sheet 3).

### **Table S2. Activity-Dependent RNA-Seq of PDCD4 WT- and S71A-transduced neurons.**

RNA-seq data from TTX-silenced and Bic-stimulated forebrain cultures, transduced with PDCD4 WT or S71A, in the presence or absence of CHX. Data for all genes (Sheet 1), data for activity-dependent genes (Sheet 2), and data for putative PDCD4 target genes (Sheet 3).

### **Table S3. GO Analysis from PDCD4 RNA-Seq.**

GO analysis data for top 15 terms by FDR for putative PDCD4 target genes (Sheet 1) and other CHX-insensitive activity-dependent genes (Sheet 2).

### **Table S4. Primer Sequences Used for Cloning and RT-qPCR.**
